# Supplementary material for: In situ stress database of the greater Ruhr region (Germany) derived from hydrofracturing tests and borehole logs
Source: Copernicus journal article supplement (doi:10.5194/essd-2022-196), 2022-06-21
Supplement: Supplementary file [file essd-2022-196-AC2-supplement.pdf]

**Tab.1. Stress measurements performed in the B2/V well (B1060V (B2V) in the manuscript).**

Tabelle 1: Messwerte  $P_c$ ,  $P_r$ ,  $P_{si}$ , horizontale Hauptnormalspannungen  $S_H$  und  $S_h$ , hydraulische Zugfestigkeit  $T = P_c - P_r$ , Richtung  $\theta$  von  $S_H$  (N ueber E).

$$P_c = S_{hydra} = 3 \cdot q \cdot h$$

$$= 2000 \cdot 200 \cdot 30 = 120000 \text{ Pa}$$

$$= 120000 / 10^5 = 12 \text{ bar}$$

Bohrung B 2/V

| Test / Meßtiefe, m | $P_c$ /bar | $P_r$ /bar | $P_{si}$ /bar | $S_H$ /bar | $S_h$ /bar | T /bar    | $\theta^\circ$ |
|--------------------|------------|------------|---------------|------------|------------|-----------|----------------|
| 6 7.95             | 160        | 90(110)    | 90            | (68-) 88   | 90         | 50-70     | 51             |
| 5 11.85            | 190        | 160        | 115           | (93)       | 115        | 30        | 46             |
| 4 17.65            | 260        | 200-235    | 170           | 183-218    | 170        | 25-60     | 20             |
| 3 21.65            | 300        | 200-270    | 180           | 178-248    | 180        | 30-100    | 40             |
| 2 25.65            | 200        | 160-170    | 155           | 203-213    | 155        | 30-40     | -              |
| 1 27.65            | 120        | 140-160    | 140           | 168-188    | 140        | -20-(-40) | -              |

**Tab.2. Stress measurements performed in the B4/V well (1078V (B4V) in the manuscript).**

Tabelle 3: Messwerte  $P_c$ ,  $P_r$ ,  $P_{si}$ , horizontale Hauptnormalspannungen  $S_H$  und  $S_h$ , hydraulische Zugfestigkeit  $T = P_c - P_r$ , Richtung  $\theta$  von  $S_H$  (N ueber E).

$$P_c = 22 \text{ bar}$$

Bohrung B 4/V

| Test / Meßtiefe, m | $P_c$ /bar | $P_r$ /bar | $P_{si}$ /bar | $S_H$ /bar | $S_h$ /bar | T /bar  | $\theta^\circ$ |
|--------------------|------------|------------|---------------|------------|------------|---------|----------------|
| 4 17.20            | 155        | 100-150    | 115           | 103-153    | 115        | 5-55    | 48             |
| 1 19.65            | 250        | 140-170    | 125           | 113-143    | 125        | 80-110  | -              |
| 2 37.30            | 80         | 75-100     | 95            | 93-118     | 95         | 5-(-20) | 3              |
