# Supplementary material for: In situ stress database of the greater Ruhr region (Germany) derived from hydrofracturing tests and borehole logs
Source: Copernicus journal article supplement (doi:10.5194/essd-2022-196), 2022-06-21
Supplement: Supplementary file [file essd-2022-196-RC1-supplement.pdf]

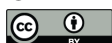

# IN SITU STRESS DATABASE OF THE GREATER RUHR REGION (GERMANY) DERIVED FROM HYDROFRACTURING TESTS AND BOREHOLE LOGS

Michał Kruszewski<sup>1,2</sup>, Gerd Klee<sup>3</sup>, Thomas Niederhuber<sup>4</sup>, and Oliver Heidbach<sup>5,6</sup>

<sup>1</sup>Fraunhofer IEG, Fraunhofer Research Institution for Energy Infrastructures and Geothermal Systems IEG, Am Hochschulcampus 1 IEG, 44801 Bochum, Germany

<sup>2</sup>Institute of Geology, Mineralogy, and Geophysics, Ruhr-University Bochum, Universitätsstraße 150, 44801 Bochum, Germany

<sup>3</sup>Solexperts GmbH (former MeSy GmbH), Meesmannstraße 49, 44807 Bochum, Germany

<sup>4</sup>Karlsruhe Institute of Technology, Institute of Applied Geosciences Division of Technical Petrophysics Campus Süd, Adenauerring 20b, Geb. 50.40, 76131 Karlsruhe

<sup>5</sup>GFZ German Research Centre for Geosciences, Telegrafenberg, 14473 Potsdam, Germany

<sup>6</sup>Technical University Berlin, Institute for Applied Geosciences, Ernst-Reuter Platz 1, 10587 Berlin, Germany

**Correspondence:** Michał Kruszewski (michal.kruszewski@ieg.fraunhofer.de)

**Abstract.** Between 1986 and 1995 429 hydrofracturing tests have been carried out in six, now abandoned, coal mines and two coal bed methane boreholes at depths between 600 and 1950 m within the greater Ruhr region in western Germany. From these tests, stress magnitudes and orientations of the stress tensor are derived. The majority of hydrofracturing tests were carried out from mine galleries away from mine workings in a relatively undisturbed rock mass. These data along with detailed information have been disclosed recently. In combination with already published material, we provide the first comprehensive stress database of the greater Ruhr region. Our study summarizes results of the extensive in situ stress test campaign and assigns quality to each data record using the established quality ranking schemes of the World Stress Map project. The stress magnitudes suggest predominantly strike-slip stress regime, where the magnitude of the minimum horizontal stress,  $S_{Hmin}$ , is half of the magnitude of the maximum horizontal stress,  $S_{Hmax}$ , implying that the horizontal differential stress is high. We observe no particular change in the stress gradient at depth throughout the Carboniferous layers and no significant difference between tests carried out in coal mines and deep boreholes. The mean  $S_{Hmax}$  orientation varies between  $133 \pm 13^\circ$  in the easternmost located Friedrich-Heinrich coal mine and  $168 \pm 23^\circ$  in the westernmost located Westfalen coal mine. The mean  $S_{Hmax}$  orientation, based on 87 data records from this as well as already published studies, of  $161 \pm 43^\circ$  is in good agreement with the regional stress orientation observed in Northwestern Europe. The presented public database provides in situ stress magnitude and stress orientation data records that are essential for the calibration of geomechanical numerical models on regional and/or reservoir scales for, among others, assessing stability issues of borehole trajectories, caverns, and georeservoirs in general. For an application example of this database, we estimate slip and dilation tendencies of major geological discontinuities, discovered during the 700-year-long coal mining activities in the region. The result shows that the discontinuities striking in the N-S and NW-SE directions have a higher slip tendency compared to the ones striking ENE-WSW and NNW-SSE, whereas a high dilation tendency is observed for discontinuities striking NNW-SSE and a low dilation tendency for the ones striking ENE-WSW.



## 1 Introduction

Knowledge of the contemporary 3D stress state in the upper crust is essential information for the design and operation of any type of subsurface operations including extraction of geothermal energy, CO<sub>2</sub> storage, or mine flooding (Segall and Fitzgerald, 1998; Henk, 2009; Blöcher et al., 2018; Kruszewski et al., 2021a). The stress state determines, among others, permeability anisotropy, extent and orientation of fractures created during hydraulic fracturing operations, slip, dilation, and stability of geological discontinuities, being it either natural fracture networks or major fault zones. To describe the 3D stress state forward geomechanical models are used and calibrated with stress magnitude data records within the model volume (e.g., Reiter and Heidbach, 2014; Hergert et al., 2015). For the latter not only the number of data records are important, but also their quality, which can be used as weights during model calibration (e.g., Lecampion and Lei, 2010; Ziegler and Heidbach, 2020). For the greater Ruhr region located in western Germany, mainly due to confidentiality reasons, a comprehensive and public compilation of in situ stress data was missing. Due to the recent change of subsurface data regulations in Germany, this data has now become accessible. Furthermore, an assignment of qualities to the individual data records has only been done for some of the data records that show the orientation of the maximum horizontal stress,  $S_{Hmax}$ , (Reiter et al., 2015) using the quality ranking scheme of the World Stress Map (WSM) project (Heidbach et al., 2016). Only recently Morawietz et al. (2020) presented a quality ranking scheme for stress magnitude data developed for the first German stress magnitude database. However, in their compilation, stress magnitude data for the greater Ruhr region is missing (Figure 1a).

The application of established quality ranking schemes is not only important for the model calibration, but also guarantees the comparability of stress data records that result from a wide range of different stress indicators, measurements, and indirect stress information (Amadei and Stephansson, 1997; Ljunggren et al., 2003; Schmitt et al., 2012).

This study presents the first comprehensive public database of stress orientation and stress magnitude data records for the greater Ruhr region including the application of established quality ranking schemes from the WSM project for the assignment of qualities for each data record. Throughout the years, few publications have already published subsets of our compilation (i.e., Kück, 1988; Müller, 1989; Müller, 1991; Stelling and Rummel, 1992; Rummel and Weber, 1993; Kruszewski et al., 2021b), however, without making critical information available i.e., test location, depth, testing method, or uncertainty. A lack of such information made utilization of such data, e.g., for the calibration of geomechanical models, impossible and qualities could be, in most cases, not reliably estimated.

We now have access to internal reports that were recently disclosed by the Deutsche Montan Technologie GmbH (DMT) and ConocoPhillips (MeSy, 1994, 1995a, e, f, g, h, i, j, k, l, b, c, d, 1996a, b, c). These reports contain essential and detailed information from 429 hydrofracturing tests, that have been performed between 1986 and 1995, in 43 vertical and horizontal boreholes in the greater Ruhr region area. This in situ measurement campaign spanned over an east-west range of around 100 km, a north-south range of approximately 55 km, and a depth range of 1.35 km (i.e., between 600 and 1950 m depth) (Figure 1b). Hydrofracturing tests were carried out in i) mine galleries of six, now abandoned, coal mines, being located far away from mine workings in relatively undisturbed rock mass using short, both vertical and horizontal, exploration boreholes



as well as in ii) two deep vertical exploration coal bed methane (CBM) boreholes located to the north of the coal mines in the  
55 Münster region.

From the collected data we derive data records of the magnitudes of the minimum,  $S_{hmin}$ , and the maximum,  $S_{Hmax}$ , horizontal  
stresses. Additionally, for each borehole the  $S_{Hmax}$  orientation was derived based on the orientations of the fractures induced  
during the hydrofracturing test. The majority of data within the database compiled here is presented for the first time to the  
wider scientific community with full open access. To our knowledge, we present all performed in situ stress tests in the greater  
60 Ruhr region along with a detailed description of testing and stress estimation methodology as well as an assignment of data  
quality using the WSM quality ranking schemes (Heidbach et al., 2016; Morawietz et al., 2020). Additionally, we provide all  
needed information for utilization of such data in numerical modelling studies for planning future subsurface activities within  
the greater Ruhr region as well as for an evaluation of the state of stress of the Carboniferous layers and its vertical and spatial  
variability.

65 This study is split into eight main parts presenting: i) an overview of the geological setting of the greater Ruhr region, ii)  
theoretical background on the stress tensor, iii) a description of each test location, iv) a description of the hydrofracturing  
procedures and testing tools, v) methodology for interpretation and evaluation of the principal stresses based on results from  
hydrofracturing tests, vi) results with a quality assignment, vii) discussion, where few ways of utilizing the database including  
slip and dilation tendency analysis of major geological discontinuities in the study region, were presented, and viii) conclusions.

## 70 2 Geological Setting

The coal-bearing strata of the greater Ruhr region, located east of the Wales-Brabant Massif, is part of an external fold and  
thrust belt of the latest stage of the Variscan orogeny (Brix et al., 1988). The Variscan orogenic belt developed throughout the  
Late Paleozoic convergence of Gondwanaland and Euramerican continental masses (Ziegler, 1990), where the convergence  
and collision occurred during the Carboniferous and Devonian geological periods.

75 The Ruhr region is under the influence of two main fault network systems. The first major fault system strikes NE-SW with  
steeply inclined to bed-parallel dip angles reaching lengths of 40 km. These thrusts have a horizontal displacement of tens to  
hundreds of meters with some reaching up to  $\sim 2.5$  km. Thrusts are dissected by a network of NW-SE striking normal faults,  
which results in a horst and graben structure of the region. Few strike-slip faults with varying orientations have been also  
seen in the region (Brix et al., 1988). The folds observed in the Ruhr region, oriented NE-SW, vary significantly in shape and  
80 dimension and have wavelengths of up to 10 km, increasing towards the north, and amplitudes of several hundred meters.

700-year-long coal mining activities across the greater Ruhr region exposed molasse-type clastic sediments of the Carbonif-  
erous period including shales, silt- to coarse-grained sandstones, and coal seams of varied strength, all heavily deformed by  
folding and thrusting (Bachmann et al., 1971). North of the Ruhr region, Cretaceous strata, in places up to 1.8 km deep (Hes-  
emann, 1965), overlays the Carboniferous layers (Drozdowski, 1993). Four deep exploratory boreholes (i.e., Münsterland  
85 1 (Hesemann, 1965), Vingerhoets 93 (Eder et al., 1983), Versold 1, and Isselburg 3 (Drozdowski, 1993)), located north of  
the Ruhr region have all reached Devonian strata. The carbonate layers of the Middle and Upper Devonian period, which are



Iserlohn is not visible on the map

part of the Devonian Reef Complex, are **outcropping south of the Ruhr region close to the city of Iserlohn (Figure 1c)**. As of today, there is, however, no direct proof of Devonian carbonates underlying the coal-bearing Carboniferous strata below the Ruhr region. Nevertheless, the DEKORP 2-N seismic line interpretations (DEKORP, 1990) indicate strong reflections, corresponding to a high material contrast at around 5 km depth, which is thought to be the depth of Devonian platform carbonates, encountered in deep boreholes north of the region (Drozdowski, 1988; Franke et al., 1990; Drozdowski, 1993). Devonian carbonates, below the Ruhr region, have been considered as potential geothermal reservoirs (Balcewicz et al., 2021; Kruszewski et al., 2021b).

Given the large lateral variability of stiffness and density as shown in the geological cross-section in Figure 1c, one of the key questions is if this also has an impact on the geomechanical stratification. Lateral density, strength, and stiffness contrasts have been proposed to cause changes in the stress field (Tingay et al., 2006; Rajabi et al., 2016), however, this has not been proven in general and not in particular for the Ruhr area. The unique data set that we investigate in the following study allows to address this question.

### 3 Reduced stress tensor

The stress state at a given point is described with a second rank tensor consisting of nine components (Figure 2a). Due to the conservation of momentum, the so-called, stress tensor is symmetric, which means that there exists a coordinate system where shear stresses vanish along the cube faces (Figure 2b). In this principal axis system, the three remaining stresses are the principal stresses (Jaeger et al., 2007). With the assumption that the vertical stress,  $S_v$ , is one of the principal stresses, which is a good approximation in the Earth crust (Zoback, 2007),  $S_{hmin}$  and  $S_{Hmax}$  are also considered as principal stresses. This, so-called, reduced stress tensor is fully determined with only four components, the  $S_{Hmax}$  orientation and the magnitudes of  $S_{hmin}$ ,  $S_{Hmax}$ , and  $S_v$  (Figure 2c).

### 4 Test locations

The test locations, where the hydrofracturing tests were carried out, ranged from the city of Hoetmar, in the Münster region, to the east and mine Friedrich-Heinrich, in the vicinity of Kamp-Lintfort, to the west. The detailed locations of the hydrofracturing tests and coal mines are presented in Figure 1b. Below, a brief description of each test locations and penetrated lithology, is presented.

#### 4.1 Kamp-Lintfort (Friedrich-Heinrich mine)

30 hydrofracturing tests on the premises of the Friedrich-Heinrich mine in the city of Kamp-Lintfort were carried out at a depth of 586 m, around 1000 m south-west from the shaft IV, in two boreholes. The first borehole is vertical with a length of 40 m drilled in compact claystone-siltstone series. The second is a 37 m long horizontal borehole drilled towards the NW direction



in compact claystone-siltstone series. The tests were located in Middle Witten formations within the Westphalian A stage of the Carboniferous period.

#### 4.2 Neukirchen-Vluyn (Niederberg mine)

27 hydrofracturing tests on the premises of the Niederberg mine in the city of Neukirchen-Vluyn were carried out at a depth of  
120 630 m in three boreholes from which two were horizontal and one vertical. The horizontal wells were drilled with azimuths of  
N120° and N97° in both sandstones and slates, whereas the vertical borehole penetrated mainly sandstones.

#### 4.3 Dinslaken (Lohberg mine)

84 hydrofracturing tests were performed on the premises of the Lohberg coal mine in the vicinity of the city of Dinslaken in ten  
boreholes. Four test locations were located on the 5th level (i.e., at a depth of 1315 m), near shaft II, with a maximum horizontal  
125 distance between test locations of around 2500 m. All test locations, except one, were located south of the Bruckhauser fault.  
Drilled boreholes had a length between approximately 33 and 60 m and penetrated either compact sandstone or claystone series  
with interlayering coal series. The horizontal boreholes were drilled in both NE and E directions. All boreholes were drilled in  
Upper Bochum formations within the Westphalian A stage of the Carboniferous period.

#### 4.4 Recklinghausen (General Blumenthal mine)

34 hydrofracturing tests were carried out in three boreholes in the General Blumenthal coal mine in the vicinity of the city  
130 of Recklinghausen. The drilling operations took place on the 9th level of the coal mine at depth of 975 m directly below the  
Dickebank coal seam. The horizontal boreholes were drilled along both NW and NNE directions. All boreholes, each 40 m  
length, were drilled in the sandstone series of the Upper Bochum formations of the Westphalian A stage of the Carboniferous  
period.

#### 135 4.5 Bergkamen (Haus Aden mine)

76 hydrofracturing tests were performed at two depths levels i.e., 750 and 998 m in ten boreholes within the Haus Aden coal  
mine in the vicinity of the city of Bergkamen. The boreholes drilled at 750 m depth, two of which were vertical and two  
horizontal, had a length of 38 to 42 m and penetrated mainly compact medium-to-fine grained sandstones, claystones, and  
few coal seams. The horizontal boreholes, at those depths, were drilled in the NE directions. At a depth level of 998 m, six  
140 boreholes (two of which were horizontal and drilled in the NE direction) with lengths ranging between 40 and 76 m were  
drilled. Tests at depth of 998 m were carried out in the Middle Bochum formations, whereas tests at depth of 750 m within the  
Upper Bochum formations. The formations penetrated by the boreholes in the Haus Aden mine belong to the Westphalian A  
stage of the Carboniferous period.



#### 4.6 Hamm (Westfalen mine)

145 149 hydrofracturing tests were carried out in the Westfalen coal mine in the vicinity of the city of Hamm (Westph.) in 13  
boreholes at two depths levels i.e., 1030 and 1250 m, where the maximum horizontal distance between tests amounted to ap-  
proximately 2100 m. At depth of 1300 m, four boreholes, two of which were horizontal (drilled in both NE and NW directions),  
with a length between 40 and 50 m were drilled. The penetrated formations included mainly compact or fractured sandstone  
and, occasionally, coal layers. At depth of 1250 m, nine boreholes with lengths between 39 and 43 m were drilled into compact  
150 sandstone layers and some coal layers. All tests were carried out in the Middle Bochum formations of the Westphalian A stage  
of the Carboniferous period.

#### 4.7 Münster area (Hoetmar and Drensteinfurt)

As a part of a coal bed methane exploration program, two deep vertical boreholes (i.e., Natrap-1 and Rieth-1) were drilled  
around 20 km from the city of Münster, north of the Ruhr region. In both boreholes, located approximately 17 km away from  
155 each other, hydrofracturing and permeability tests were carried out in cased and open hole borehole sections. In the Natrap-1  
well, located approximately 1.5 km north of the city of Hoetmar, cased hole tests were carried out in three perforated sections  
between 1380 and 1949 m depth, within eleven coal seams, and open hole tests between 1418 and 1935 m depth. In total, 17  
hydrofracturing tests were carried out in the Natrap-1 borehole. All tests were carried out in both Westphalian A and B stages  
of the Carboniferous geological period. In the Rieth-1 borehole, located around 4 km south-west of the city of Drensteinfurt,  
160 hydrofracturing tests were carried out in ten perforated cased borehole sections at depths between 1082 and 1582 m and open  
borehole sections between depths of 1694 and 1705 m. In total, 12 hydrofracturing tests were performed in coal seams and  
coal-bearing formations in the Westphalian A stage of the Carboniferous geological in the Natrap-1 borehole. An estimation  
of hydrofracturing tensile strength and fracture breakdown pressure was only possible for open hole tests, whereas no tests of  
the orientation of  $S_{Hmax}$  were carried out in the deep boreholes, primarily due to the difficulty of revealing fracture orientation  
165 in perforated borehole sections.

### 5 Measuring system and testing procedure

All hydrofracturing tests were carried out by the former MeSy GmbH (now Solexperts GmbH) and their proprietary testing  
equipment designed for deep mines and conditions of high differential pressures ranging between 30 and 40 MPa. The packer  
system was designed for 48 to 60 mm diameter boreholes. The packer tool was tripped into a vertical borehole on a steel  
170 cable together with two hydraulic lines of 6 to 8 mm inside diameter for both, packer and zonal pressurization. The length  
of each packer element was about 1 m and the interval between packers had a length of around 0.6 m. Pressure data was  
recorded at the wellhead with a mechanical data acquisition system respecting the safety requirements. A schematic picture  
of a hydrofracturing test in a vertical and horizontal borehole in a coal mine is presented in Figure 3. In each borehole, of  
about 40 m length, multiple interval sections were tested beginning from the bottom of the borehole and moving towards the

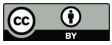

175 wellhead. The following procedure was conducted at each interval: i) inflation of the packer system at the desired depth, ii) pressurizing of the test interval to a small differential pressure to ensure that the selected location is suited for hydrofracturing test (i.e., proving that no significant open fractures exist at the depth of interest), iii) pressurizing the interval until formation breakdown (i.e., fracture initiation) with a pumping rate of a few l/min, termination of fluid injection and system shut-in, iv) several repressurizations of the test interval until constant injection pressure is reached (so-called refrac test); termination of  
180 injection and shut-in to determine refrac (or reopening) and instantaneous shut-in pressures, and v) deflating the packer system and moving to another test section. A schematic example of a hydrofracturing test from one of the coal mines in the Ruhr region, with its characteristic phases, is presented in Figure 4a. After all hydrofracturing tests were carried out in a given borehole, in most cases, the double packer tool was replaced with the impression packer tool consisting of a single packer element with a soft rubber membrane and a magnetic single shot for a test of the fracture orientation. In deep boreholes, in  
185 both cased and open hole borehole sections, similar procedures as for the ones in coal mines, as described above, were utilized with few improvements including, among others, utilizing an additional computer-based digital data acquisition system rather than a mechanical pressure recording device.

## 6 Data interpretation and in situ stress estimation

### 6.1 Coal mines

190 To interpret stress magnitudes based on the pressure curves recorded during hydrofracturing tests conducted in anisotropic and fractured carboniferous rock mass (Figure 4) inversion techniques following the classical hydraulic fracturing theory (Hubbert and Willis, 1957; Amadei and Stephansson, 1997; Haimson and Cornet, 2003; Schmitt et al., 2012) were applied. For its application it has been assumed that i) a borehole is aligned with a principal stress axis. Such an assumption will be valid mainly for vertical boreholes, located away from mine workings or in deep boreholes; ii) rock mass is homogeneous and  
195 isotropic. Neglecting coal seams, the compact sandstone and siltstone layers fulfill this assumption i.e., fracture propagation remains not affected by the properties of the rock mass; iii) fracturing fluid does not penetrate the rock prior to the fracture initiation. As the permeability of the rock mass of the carboniferous rocks is extremely low, this assumption remains valid; iv) once the fracture is initiated, it propagates in the direction perpendicular to the orientation of the  $S_{hmin}$ . As this assumption remains true for vertical boreholes, it may not be true for the horizontal boreholes in cases when a borehole is not aligned with  
200 a principal stress axis. In few cases, drilling direction of horizontal boreholes was selected accordingly with the results from a vertical borehole accounting for mine geometry restrictions. For other cases, the orientation of horizontal principal stresses was unknown prior to testing and drilling direction was limited by the mine geometry. In a case of a borehole being not aligned with a principal stress axis, fracture orientation was excluded from the further analysis.

A schematic example of a hydrofracturing test from one of the coal mines in the Ruhr region with estimates of the shut-in  
205 pressure during fracture closure,  $P_{si}$ , fracture reopening pressure,  $P_r$ , the rock mass (hydrofracturing) tensile strength,  $P_{co}$ , and the breakdown pressure at fracture initiation,  $P_c$ , is presented in Figure 4a. Utilizing the classical hydraulic fracturing theory (Hubbert and Willis, 1957; Amadei and Stephansson, 1997; Haimson and Cornet, 2003; Schmitt et al., 2012) and assuming

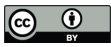

negligible pore pressure,  $P_0$ , in impermeable and compact carboniferous rock mass within the Ruhr region, for a case of vertical boreholes, where a vertical fracture was induced  $S_{hmin}$  is assumed to be equal to  $P_{si}$

$$210 \quad S_{hmin} = P_{si} . \quad (1)$$

For the case of vertical boreholes and vertical fracture,  $S_{Hmax}$  was computed as follows

$$S_{Hmax} = 3S_{hmin} - P_r - P_0 . \quad (2)$$

Utilizing the bulk density,  $\rho_b$ , of the rock mass of  $2500 \text{ kg m}^{-3}$  (Brenne, 2016; Duda and Renner, 2012), and the true vertical depth (TVD) of a test location,  $z$ ,  $S_v$  was computed using

$$215 \quad S_v = \int_0^z \rho_b(z) g dz . \quad (3)$$

In a case of a horizontal borehole aligned with  $S_{Hmax}$  orientation and a vertical fracture induced, estimation of  $S_{hmin}$  was calculated accordingly to Equation 1. If a horizontal borehole was drilled along the  $S_{Hmax}$  orientation, instead of estimating  $S_{Hmax}$  magnitude, as in the case of a vertical well,  $S_v$  magnitude was estimated instead

$$S_v = 3S_{hmin} - P_r - P_0 . \quad (4)$$

220 For the case of horizontal boreholes aligned with  $S_{hmin}$  orientation and a radial fracture,  $S_{hmin}$  estimation follows Equation 1. The same goes for the estimation of  $S_{hmin}$  from horizontal boreholes aligned with  $S_{hmin}$  orientation and a vertical fracture. Additionally, in this particular case,  $S_v$  was calculated with Equation 4. For a case of horizontal boreholes aligned with  $S_{hmin}$  orientation and a horizontal fracture,  $S_v$  was assumed to be equal to  $P_{si}$

$$S_v = P_{si} , \quad (5)$$

225 whereas  $S_{Hmax}$ , for this particular case, was computed as follows

$$S_{Hmax} = 3S_v - P_r - P_0 . \quad (6)$$

The results from vertical boreholes can be considered to yield better quality results than horizontal boreholes, due to the uncertainty connected to their alignment with a principal stress axis.





## 6.2 Deep boreholes

230 In deep boreholes, the shut-in pressure was determined using a three-step analysis of the pressure plots which included: i) pressure vs. flow rate plot, where the moment at which flow is stopped, was used to estimate an upper bound on  $P_{si}$ ; ii) Muskat pressure plot for estimating the lower bound on  $P_{si}$ , assuming that the linear part of the plot characterizes radial flow (i.e., that the stimulated fracture is closed); iii) within the two limits,  $P_{si}$  value marks the transition from a rapid linear pressure drop to a diffusion dominated pressure decrease, where the transition can be determined by a tangent (i.e., inflection point) method (Figure 4b). In some hydrofracturing tests, determination of  $P_{si}$  could be only carried out through pressure versus flow rate plots. Considering the system stiffness,  $P_r$  was constrained based on the deviation of the linear pressure versus injected volume plot (Figure 4c) which indicates fracture opening.  $P_c$  was determined as the maximum pressure registered during the fracture initiation phase of a hydrofracturing test (Figure 4d). As the analysed deep boreholes were drilled vertically, Equation 1 and Equation 2 were used to estimate  $S_{hmin}$  and  $S_{Hmax}$ , respectively. Equation 3 and an assumption of  $\rho_b$  of the rock mass of 240  $2500 \text{ kg m}^{-3}$ , was used to estimate  $S_v$  from the two deep boreholes.

## 7 Results

### 7.1 Fracture initiation, refracturing, and shut-in pressure

The detailed results of  $P_{si}$ ,  $P_r$ ,  $P_c$ , and  $P_{co}$  averaged within each borehole and their uncertainties are presented in Table 1. Both  $P_{si}$  and  $P_r$  show relatively small uncertainties amounting to values between 2 and 4 MPa and present no significant variations, 245 except increasing magnitudes with depth. Characteristic pressure peaks for fracture reopening pressure during subsequent slow pumping rates were observed. Pressures only slightly decreased during shut-in, which is an indication of extremely low rock permeability.  $P_c$ , on the other hand, shows significant variations due to local rock strength variations, and relatively high uncertainties of about 5 MPa on average.  $P_c$  values are high, approaching, at times, technical limits of the testing tool. The tensile strength of the rock mass, computed from the in situ stress tests can be considered as high, with an average tensile 250 strength of 6.5 MPa for the study region. An increasing trend of  $P_{co}$  with depth was observed.

### 7.2 In situ stress magnitudes and quality assignment

The results of the determined in situ stress magnitudes are presented in Table 2. Based on the collected data, it can be observed, that  $S_{hmin}$  is significantly lower than the vertical stress (with an average ratio of 0.6), whereas  $S_{Hmax}$  is, on average, around 1.9 times higher than the  $S_{hmin}$ , proving high differential stresses at depth in the studied area. The vertical stress derived from the 255 horizontal boreholes agrees with the vertical stress computed for the overburden bulk density of  $2500 \text{ kg m}^{-3}$ , with a few tests slightly exceeding this value. The  $S_{Hmax}$  magnitude is higher than the vertical stress with an average ratio of 1.2. Although, there is an always-present uncertainty related, especially, to the estimation of  $S_{Hmax}$  based on the classical hydraulic fracturing approach used in this study, values of  $S_{Hmax}$  from both coal mines and deep boreholes are comparable and, therefore, should be treated as reliable. Generally, the studied region represents strike-slip stress regime, where  $S_{hmin} < S_v < S_{Hmax}$  (Figure 5a). Based

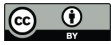

260 on the average stress values from each test location presented in Table 3, gradients of  $S_{hmin}$ ,  $S_{Hmax}$ , and  $S_v$  valid for depths between 0.6 and 1.7 km with their coefficient of determination,  $R^2$ , are as follows

$$S_{hmin} = 0.0134z + 1.2893; (R^2 = 0.74) , \quad (7)$$

$$S_{Hmax} = 0.0248z + 3.9588; (R^2 = 0.52) , \quad (8)$$

$$S_v = 0.0234z + 1.2675; (R^2 = 0.92) . \quad (9)$$

265 It can be observed, that at depths between 1000 and 1300 m especially the horizontal stresses are slightly lower than the tests carried out at shallower or greater depths, pointing towards a more extensional stress regime. Based on Figure 6, which presents a normalized stress polygon with averaged results from each location (differentiating depth levels) computed within this study (Table 3) one can see that the majority of stress tests fall predominantly into a strike-slip stress regime and only a few present normal stress regime. Looking at Figure 5b, which presents a so-called mean stress ratio,  $k$ , (i.e., a ratio of average horizontal stress,  $S_h$ , and  $S_v$ ), it could be concluded that stress does not change significantly at depth and that an average  $k$  value of 0.86 represents the studied area the most accurately. For comparison, stress ratio computed based on the approach by Sheorey (1994) for Young modulus,  $E_{sh}$ , of  $36 \pm 11$  GPa, which was based on 29 static measurements on fine-grained sandstone core samples extracted from the H13 borehole from the Westfalen coal mine at 1250 m depth (MeSy, 1994) is presented in Figure 5b.

275 After data evaluation, the quality ranking scheme developed by Morawietz et al. (2020) was applied for the derived  $S_{hmin}$  magnitudes. The test results collected within this study, as well as ones from already published studies were summarized in Table 4. In total, 429 hydrofracturing tests were carried out during the measurement campaign. Based on these tests, 429 unique  $S_{hmin}$  data records were derived from which 367 received the highest, i.e., A-quality, 19 data records received C-quality (due to the tests being carried out in the cased borehole sections), and 43 data records, where it was not possible to derive the  $S_{hmin}$  magnitude, received E-quality (due to either no pressure build-up in the tested interval or an estimation of  $S_v$  magnitude, 280 instead of  $S_{hmin}$ , in the case of several horizontal boreholes).

Furthermore, based on 429 hydrofracturing tests, 188 data records of  $S_{Hmax}$  magnitudes, and 341 data records of  $S_v$  magnitudes were derived. The magnitudes of  $S_v$  are a combination of stress magnitude values derived from hydrofracturing tests for horizontal boreholes and estimations of  $S_v$  magnitudes computed accounting for the bulk density of the rock mass of  $2500 \text{ kg m}^{-3}$  (Duda and Renner, 2012; Brenne, 2016) for vertical boreholes (Table 2). The stress test quality assessment developed by 285 Morawietz et al. (2020), as of today, refers to the  $S_{hmin}$  magnitudes only and, therefore, no quality was assigned to both  $S_{Hmax}$  and  $S_v$  magnitudes.



### 7.3 $S_{Hmax}$ orientations and quality assignment

Following the WSM data assessment guidelines and the WSM quality ranking scheme (Heidbach et al., 2016), an estimation of the mean orientation of the induced fractures, assumed to be equal to the mean  $S_{Hmax}$  orientation, was carried out in each borehole. For the estimation of the mean  $S_{Hmax}$  orientation and its standard deviation from each borehole, needed for the quality assignment (Heidbach et al., 2016), the statistics of bi-polar data (Mardia, 1975) were utilized.

From 429 hydrofracturing tests, in 254 cases the orientation of the induced fractures has been measured. From this data set, 38  $S_{Hmax}$  orientation data records were derived. These acquired  $S_{Hmax}$  orientations, increase the number of data records in the greater Ruhr region from 49, which are already available in the WSM database release from 2016 (Heidbach et al., 2018), to 87. In some hydrofracturing tests, several fractures were observed at the same test location. Once these fracture orientation differed from each other by more than  $25^\circ$ , the data record was not taken into account for further analysis. This procedure was performed to exclude data records with high uncertainties regarding the fracture orientations being an actual indicator of the  $S_{Hmax}$  orientation. The resulting  $S_{Hmax}$  orientation, including its standard deviation using the statistic of bi-polar data, is provided in the last column of Table 2. Figure 7 shows the final stress map with the distribution of  $S_{Hmax}$  orientations of the greater Ruhr area. Since the boreholes in the six investigated coal mines areas are close to each other, derived  $S_{Hmax}$  orientations are represented with six polar plots presenting mean values (solid black line) and its standard deviation (dashed black line) from each mine.

As presented in Table 2, the uncertainty of six  $S_{Hmax}$  orientations is considered as high, as it is either equal to or higher than  $40^\circ$ . These data records were assigned the lowest i.e., E-quality according to the quality assessment by Heidbach et al. (2016). Due to the short length of the tested intervals (i.e., less than 40 m), the rest of 32  $S_{Hmax}$  orientation data records from hydrofracturing tests were deemed to be of D-quality according to the WSM quality assessment (Heidbach et al., 2016).

## 8 Discussion

Based on the collected data five main points regarding the in situ stress state of the greater Ruhr region can be made. These points were summarized below.

- i) Neglecting the accuracy of the  $S_{Hmax}$  magnitude estimation method based on classical hydraulic fracturing theory, it can be concluded that the studied region is primarily under the influence of strike-slip stress regime, with few outsider values indicating normal faulting stress regime. Neglecting the few scattered values, vertical stress constrained from the horizontal boreholes proved to agree with the vertical stress recomputed for the overburden density of  $2500 \text{ kg m}^{-3}$ .
- ii) Results from hydrofracturing tests from the two deep boreholes and coal mines proved to be relatively similar, therefore, it can be assumed that the infrastructure of the coal mines does not significantly disturb the in situ stress field (at least not in the areas where the tests were carried out).
- iii) There is no particular spatial and vertical difference in stress magnitudes across the studied region, which can be considered homogeneous on a more regional scale in terms of the stress state conditions, except for the usual increase of



stresses at depth. This can be observed in Figure 8, where results from hydrofracturing tests and borehole logging in the Natrap-1 well, which intersected different lithostratigraphic units of the Carboniferous period, were presented. No significant change in stress magnitudes, and permeability, is observed in this well between layers of Westphalian A and B stage of the Carboniferous geologic period depths. Interestingly enough, an increase of  $S_{hmin}$  and a significant decrease of  $S_{Hmax}$  was observed at depths where a permeable fault zone was intersected in the borehole. Similar occurrences were previously observed in the literature (e.g., Wu and Zoback, 2008). This could prove that the major differences in stresses at depth will be potentially related to geological discontinuities such as fault zones. It means that neither stress decoupling nor strong lithological differences of stress are to be anticipated within the Carboniferous layers in the region. At deeper depths and below Carboniferous strata, where Devonian carbonates, considered to be much stiffer than the Carboniferous rocks (Balcewicz et al., 2021), are expected to exist (DEKORP, 1990), one could expect stress variations, being different from the estimated trends for the Carboniferous layers. A slight decrease of the stress state has been observed between 1000 and 1300 m depth. It is, however, unknown what caused this phenomenon and to what degree coal mining activities were responsible for it.

iv) Although, a slight fan-like shape of the azimuth of  $S_{Hmax}$  was observed spanning between NW-SE orientation in the west and NNW-SSE  $S_{Hmax}$  orientation in the east of the region, and singular  $S_{Hmax}$  orientation data records demonstrated significant scatter and uncertainty, the mean  $S_{Hmax}$  orientation of  $167 \pm 35^\circ$  of the whole study area is in a good agreement with the stress orientation of Northwestern Europe (Baumann, 1981). Accounting for the 49  $S_{Hmax}$  orientations, already available within the WSM (Heidbach et al., 2018), the mean  $S_{Hmax}$  orientation of the greater Ruhr region amounts to  $161 \pm 43^\circ$  (Figure 7). It remains, however, unknown if the fan-like shape of the  $S_{Hmax}$  orientation could be related to e.g., a larger tectonic unit such as Lower Rhine Graben or if it is a result of geological anisotropies. Additionally, the primary NNW-SSE orientation of  $S_{Hmax}$  proves that the infrastructure of the coal mine does not influence the stress field in a significant way (at least not in the areas where tests were carried out).

v) The permeability of the coal-bearing formations of the Carboniferous layers in the Ruhr region is extremely low and amounts to an average value of 0.1 mD (or  $9.6e-17 \text{ m}^2$ ). No clear permeability dependence with depth was observed in the two investigated deep boreholes.

### 8.1 Slip and dilation tendency

To showcase how a data set presented in this study can be utilized, slip and dilation tendencies were calculated for the major geological discontinuities, discovered throughout the 700-year-long coal mining activities in the Ruhr region (GD NRW, 2017). The average  $S_{Hmax}$  orientation of  $161^\circ$ , obtained from this study, and Equation 7, 8, and 9 were used to constrain the in situ stress state at a depth of 1200 m, representing coal mining depth. The assumption was made that the pore pressure starts from the surface level and that the pore fluid has a constant density of  $1120 \text{ kg m}^{-3}$  (Wedewardt, 1995). Another assumption, caused by the lack of data on the dip angles of major faults, assumes that all evaluated discontinuities are vertical. As this may not be always true in reality, i.e., fault's dip may significantly differ and, thus, influence the value of slip or dilation tendency. It is,



therefore, advised to treat results of the slip and dilation tendency in a more relative manner, rather than treating the results as absolute values. Based on the above-mentioned assumptions and stress gradients developed in this study,  $P_p$  of 13.2 MPa,  $S_{hmin}$  of 17.4 MPa,  $S_{Hmax}$  of 33.7 MPa, and  $S_v$  of 29.3 MPa were used. Based on the methodology presented in Jaeger et al. (2007),  
355 normal effective and shear stresses were computed for each discontinuity segment, and simultaneously slip (Morris et al., 1996) and dilation (Ferrill et al., 1999) tendencies were calculated. Results of these computations are presented in Figure 9 and Figure 10. As it can be seen in Figure 9, where the color of a discontinuity segment represents different slip tendency values, the N-S and NW-SE-striking discontinuities (with azimuths of N5 and N137, respectively) have the highest slip tendency values. This indicates that these structures are the most prone to be reactivated (either a- or co-seismically) by pressure and/or  
360 temperature changes created during e.g., geothermal fluid production or fluid injection. On the other hand, discontinuities that are considered 'locked' in the prevailing stress state are the ones striking in the ENE-WSW and NNW-SSE directions (with azimuths of N71 and N161, respectively). Figure 10 presents the results of dilation tendencies for the discontinuities within the Ruhr region, where the color of a discontinuity segment represents different dilation tendency values. It can be observed that the NNW-SSE-striking structures (with an azimuth of N161), i.e., ones striking along  $S_{Hmax}$  orientation, will be the ones that are the  
365 most likely to stay open (if not filled by e.g., secondary fluid mineralization) in the prevailing stress regime. These geological discontinuities will be, therefore, the most permeable ones within the region, and could be considered as potential targets for e.g., establishing a geothermal systems. On the contrary, the hydraulically 'dead' discontinuities will be the ones striking ENE-WSW (with an azimuth of N71). These impermeable structures could lead to e.g., reservoir compartmentalization.

## 9 Conclusions

370 Within this study, we present for the first time a comprehensive assessment of 429 hydrofracturing tests that were carried out in 43 vertical and horizontal boreholes located across the greater Ruhr region recorded between 1986 and 1995. The database presented here is the world's largest public database of stress magnitudes from a single region. Based on the analysis carried out in this study, we could derive 429 data records of  $S_{hmin}$  magnitude with assigned qualities. This database nearly doubles the number of stress magnitudes currently available for Germany, and its adjacent regions, from 568 to 997 unique  $S_{hmin}$  values.  
375 Additionally, based on 254 single measurements of the orientation of the induced fractures in exploration boreholes, we derived 38 new data records of the  $S_{Hmax}$  orientation, simultaneously nearly doubling the amount of already available stress orientation data records from 49 to 87 for the greater Ruhr region. We conclude from the principal stress magnitudes that the stress regime is predominantly strike-slip, where  $S_{Hmax}$  is approximately double the size of  $S_{hmin}$ , implying high differential horizontal stresses in the subsurface. We also conclude no substantial spatial or vertical change of stress state or stress decoupling within the  
380 Carboniferous layers of the greater Ruhr region, implying a relatively homogeneous stress field. No significant difference between the results of tests carried out in coal mines and deep boreholes were observed proving the small influence of the mine infrastructure on the test result (at least not in the areas where tests were carried out). The average  $S_{Hmax}$  orientation amounts to  $161 \pm 43^\circ$  and is in good agreement with the NW-SE  $S_{Hmax}$  orientation of Northwestern Europe. Utilizing results from this study, slip and dilation tendencies of major geological discontinuities within the Ruhr region were calculated. The N-S and



385 NW-SE-striking structures prove to be the most critically stressed and host the highest potential for either a- or co-seismic fault  
reactivation, whereas the NNW-SSE-striking discontinuities, if not filled, are the most permeable structures in the region and  
may be considered as potential exploration targets for geothermal energy provision. The database, created within this study,  
presents unique and high-quality stress input data for future reservoir and geomechanical numerical models and should aid  
the subsurface operations in the region. This study could also serve as a template for other national (and international) stress  
390 magnitude compilations.

## 10 Data availability

The stress magnitude data base is available under [dx.doi.org/10.24406/fordatis/201](https://dx.doi.org/10.24406/fordatis/201) (Kruszewski et al., 2022b), whereas the  
stress orientation data base is available under [dx.doi.org/10.24406/fordatis/200](https://dx.doi.org/10.24406/fordatis/200) (Kruszewski et al., 2022a).

*Author contributions.* MK released the in-situ stress data from the data owner to the public, compiled, validated, analysed, and visualised  
395 the data, coordinated and conceptualized the study, as well as prepared and wrote the first draft manuscript. GK enabled contact with data  
owners, provided hydrofracturing reports, and reviewed the manuscript. TN reviewed the manuscript. OH acquired approval from the data  
owners for public release of data, helped with conceptualisation of the study, as well as co-wrote, and reviewed the manuscript.

*Competing interests.* The authors declare that they have no conflict of interest.

*Disclaimer.* The authors reserve the right not to be responsible for the topicality, correctness, completeness, and quality of the information  
400 provided. Liability claims regarding damage caused by the use of any information provided will be rejected. Conclusions made in this study  
are solely opinions of the authors and do not express the views of the employer, university, or funding agency.

*Acknowledgements.* This publication is dedicated to the memory of Prof. Dr. Fritz Rummel who passed away in 2019 and has been for many  
years involved in carrying out hydrofracturing tests across the greater Ruhr region. The authors are particularly grateful to ConocoPhillips and  
Deutsche Montan Technologie GmbH (DMT) for providing an opportunity to review and summarize the vast amount of hydrofracturing data  
405 obtained between 1986 and 1995 in the greater Ruhr region as well as borehole logging data. The authors especially thank Mr. Peter Bormann  
from ConocoPhillips and Prof. Dr. Bodo Lehmann from DMT. The authors would like to also thank engineers, scientists, mining, and drilling  
technicians that were involved in carrying out hydrofracturing tests analysed in this study. The authors would like to especially thank the  
personnel of the former MeSy GmbH, that prepared many technical reports and summaries which served as a base for this work. The authors  
would like to also acknowledge the help of Dr. Thomas Reinsch from Fraunhofer IEG, Prof. Dr. Erik H. Saenger from Fraunhofer IEG and  
410 Bochum University of Applied Sciences, Dr. Thomas Röckel from Piewak & Partner GmbH, and Dr. Birgit Müller from Karlsruhe Institute  
of Technology during the preparation period of this manuscript. The funding of the Geothermale Papiertrocknung project (EFRE-0801837)

<https://doi.org/10.5194/essd-2022-196>  
Preprint. Discussion started: 21 June 2022  
© Author(s) 2022. CC BY 4.0 License.

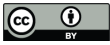

depicting the frameworks for the elaboration of the present study, by the European Union and the Ministry for Economic Affairs, Innovation, Digitalization and Energy of the State of North Rhine-Westphalia and the Ministry of Culture and Science of the State of North Rhine-Westphalia, respectively, is greatly appreciated. The funding of the 3DRuhrMarie (“FHprofUnt2016”) project from the German Federal  
415 Ministry of Education and Research and geomecon GmbH is also acknowledged.



## References

- Amadei, B. and Stephansson, O.: Rock stress and its measurement, Chapman & Hall, 1997.
- Bachmann, M., Michelau, P., and Rabitz, A.: Das Rhein-Ruhr-Revier Stratigraphie, *Fortschr. Geol. Rheinld. u. Westf.*, 19, 19–33, 1971.
- Balcewicz, M., Ahrens, B., Lippert, K., and Saenger, E. H.: Characterization of discontinuities in potential reservoir rocks for geothermal applications in the Rhine-Ruhr metropolitan area (Germany), *Solid Earth*, 12, 35–58, <https://doi.org/10.5194/se-12-35-2021>, 2021.
- 420 Baumann, H.: Regional Stress Field and Rifting in Western Europe, in: Mechanism of Graben Formation, edited by ILLIES, J., vol. 17 of *Developments in Geotectonics*, pp. 105–111, Elsevier, <https://doi.org/10.1016/B978-0-444-41956-9.50013-7>, 1981.
- Blöcher, G., Cacace, M., Jacquey, A. B., Zang, A., Heidbach, O., Hofmann, H., Kluge, C., and Zimmermann, G.: Evaluating micro-seismic events triggered by reservoir operations at the geothermal site of Groß Schönebeck (Germany), *Rock Mechanics and Rock Engineering*, 425 51, 3265–3279, 2018.
- Brenne, S.: Hydraulic fracturing and flow experiments on anisotropic and pre-fractured rocks, Ph.D. thesis, Ruhr-University Bochum, Bochum, Germany, 2016.
- Brix, M., Drozdowski, G., Greiling, R., Wolf, R., and Werde, V.: The N Variscan margin of the Ruhr coal district (Western Germany): structural style of a buried thrust front?, *Geol Rundsch*, 77, 115–126, <https://doi.org/10.1007/BF01848679>, 1988.
- 430 DEKORP: Results of deep-Seismic reflection investigations in the Rhenish Massif, *Tectonophysics*, 173, 507–515, [https://doi.org/10.1016/0040-1951\(90\)90242-Z](https://doi.org/10.1016/0040-1951(90)90242-Z), *sismic Probing of Continents and their Margins*, 1990.
- Drozdowski, G.: Die Wurzel der Osning-Überschiebung und der Mechanismus herzynischer Inversionsstörungen in Mitteleuropa, *Geologische Rundschau* (1910. Print), 1988.
- Drozdowski, G.: The Ruhr coal basin (Germany): structural evolution of an autochthonous foreland basin, *International Journal of Coal Geology*, 23, 231–250, [https://doi.org/10.1016/0166-5162\(93\)90050-K](https://doi.org/10.1016/0166-5162(93)90050-K), 1993.
- 435 Duda, M. and Renner, J.: The weakening effect of water on the brittle failure strength of sandstone, *Geophysical Journal International*, 192, 1091–1108, <https://doi.org/10.1093/gji/ggs090>, 2012.
- Eder, F., Engel, W., Franke, W., and Sadler, P.: Devonian and Carboniferous limestone-turbidites of the Rheinisches Schiefergebirge and their tectonic significance, in: *Intracontinental fold belts*, pp. 93–124, Springer, 1983.
- 440 Ferrill, D., Winterle, J., Wittmeyer, G., Sims, D., Colton, S., and Armstrong, A.: Stressed Rock Strains Groundwater at Yucca Mountain, Nevada, in: *GSA Today, A Publication of the Geological Society of America*, vol. 2, No. 5, pp. 2–8, 1999.
- Franke, W., Bortfeld, R., Brix, M., Drozdowski, G., Dürbaum, H., Giese, P., Janoth, W., Jödicke, H., Reichert, C., Scherp, A., et al.: Crustal structure of the Rhenish Massif: results of deep seismic reflection lines DEKORP 2-North and 2-North-Q, *Geologische Rundschau*, 79, 523–566, 1990.
- 445 GD NRW: Großtektonik Ruhrgebiet, <https://www.opengeodata.nrw.de/produkte/geologie/geologie/SP/grosstekruhr/3b81e661-ac40-44f9-ab8a-93a8bed8b620>, online; accessed 10 January 2022, 2017.
- Haimson, B. and Cornet, F.: ISRM suggested methods for rock stress estimation—part 3: hydraulic fracturing (HF) and/or hydraulic testing of pre-existing fractures (HTPF), *International Journal of Rock Mechanics and Mining Sciences*, 40, 1011–1020, 2003.
- Heidbach, O., Barth, A., Müller, B., Reinecker, J., Stephansson, O., Tingay, M., and Zang, A.: WSM quality ranking scheme, database description and analysis guidelines for stress indicator, 2016.
- 450 [https://gfzpublic.gfz-potsdam.de/rest/items/item\\_4732890\\_4/component/file\\_4732894/content](https://gfzpublic.gfz-potsdam.de/rest/items/item_4732890_4/component/file_4732894/content)



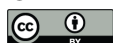

- Heidbach, O., Rajabi, M., Cui, X., Fuchs, K., Müller, B., Reinecker, J., Reiter, K., Tingay, M., Wenzel, F., Xie, F., Ziegler, M., Zoback, M. L., and Zoback, M.: The World Stress Map database release 2016: Crustal stress pattern across scales, *Tectonophysics*, 744, 484–498, <https://doi.org/10.1016/j.tecto.2018.07.007>, 2018.
- Henk, A.: Perspectives of Geomechanical Reservoir Models - Why Stress is Important, *Oil Gas European Magazine*, 35, 20–24, 2009.
- 455 Hergert, T., Heidbach, O., Reiter, K., Giger, S., and Marschall, P.: Stress field sensitivity analysis in a sedimentary sequence of the Alpine foreland, Northern Switzerland, *Solid Earth*, 6, <https://doi.org/10.5194/se-6-533-2015>, 2015.
- Hesemann, J.: Die Ergebnisse der Bohrung Münsterland 1, VS Verlag für Sozialwissenschaften, [https://doi.org/10.1007/978-3-663-06999-7\\_3](https://doi.org/10.1007/978-3-663-06999-7_3), 1965.
- Hubbert, M. K. and Willis, D. G.: Mechanics of hydraulic fracturing, *Transactions of the AIME*, 210, 153–168, 1957.
- 460 Jaeger, J., Cook, N., and Zimmerman, R.: *Fundamental of Rock Mechanics*, <https://doi.org/10.1017/CBO9780511735349>, 2007.
- Kruszewski, M., Hofmann, H., Alvarez, F. G., Bianco, C., Haro, A. J., Garduño, V. H., Liotta, D., Trumpy, E., Brogi, A., Wheeler, W., et al.: Integrated stress field estimation and implications for enhanced geothermal system development in Acoculco, Mexico, *Geothermics*, 89, 101 931, 2021a.
- Kruszewski, M., Montegrossi, G., Backers, T., and Saenger, E. H.: In Situ Stress State of the Ruhr Region (Germany) and Its Implications for Permeability Anisotropy, *Rock Mechanics and Rock Engineering*, 54, 6649–6663, 2021b. <https://doi.org/10.1007/s00603-021-02636-3>
- Kruszewski, M., Klee, G., Niederhuber, T., and Heidbach, O.: In-Situ Stress Orientation Data from the Greater Ruhr Region (Germany) Derived from Hydrofracturing Tests and Borehole Logs, <http://dx.doi.org/10.24406/fordatis/200>, 2022a.
- Kruszewski, M., Klee, G., Niederhuber, T., and Heidbach, O.: In-Situ Stress Magnitude Data from the Greater Ruhr Region (Germany) Derived from Hydrofracturing Tests and Borehole Logs, <http://dx.doi.org/10.24406/fordatis/201>, 2022b.
- 470 Kück, J.: Hydraulic Fracturing Gebirgsspannungsmessungen auf der 940 m Sohle des Ruhrkohle-Bergwerks Haus Aden. Diplomarbeit., Ph.D. thesis, Ruhr-Universität Bochum, Bochum, Germany, 1988.
- Lecampion, B. and Lei, T.: Reconstructing the 3d initial stress state over reservoir geo-mechanics model from local measurements and geological priors: a bayesian approach, *Schlumberger J Model Des Simul*, 1, 100–4, 2010.
- Ljunggren, C., Chang, Y., Janson, T., and Christiansson, R.: An overview of rock stress measurement methods, *International Journal of Rock Mechanics and Mining Sciences*, 40, 975–989, 2003.
- 475 Mardia, K. V.: Statistics of directional data, *Journal of the Royal Statistical Society: Series B (Methodological)*, 37, 349–371, 1975.
- MeSy: Compilation of Existing Hydrofrac In-Situ Stress Data For the Ruhr Carboniferous. Report No. 28.94, internal report in German (unpublished), 1994.
- MeSy: CBM - Project Sigillaria License Area. Cased-Hole Permeability And Hydrofrac Stress Measurements in Borehole Natrap-1. Final Report. Report No. 39.95, internal report in German (unpublished), 1995a.
- 480 MeSy: CBM - Project Sigillaria License Area. Open-Hole Permeability And Hydrofrac Stress Measurements in Borehole Rieth-1. Final Report. Report no. 27.95, internal report in German (unpublished), 1995b.
- MeSy: CBM - Project Sigillaria License Area. Open-Hole Permeability And Hydrofrac Stress Measurements in Borehole Rieth-1. Operation Report., internal report in German (unpublished), 1995c.
- 485 MeSy: CBM - Project Sigillaria License Area. Open-Hole Permeability And Hydrofrac Stress Measurements in Borehole Natrap-1. Final Report. Report no. 35.95, internal report in German (unpublished), 1995d.
- MeSy: CBM - Project Sigillaria License Area. Cased-Hole Permeability And Stress Measurements in Borehole Natrap-1. Operation Report and Overview Plots., internal report in German (unpublished), 1995e.



- MeSy: CBM - Project Sigillaria License Area. Cased-Hole Permeability And Stress Measurements in Borehole Rieth-1. Final Report. Report  
490 No. 29.95, internal report in German (unpublished), 1995f.
- MeSy: CBM - Project Sigillaria License Area. Cased-Hole Permeability And Stress Measurements in Borehole Rieth-1. Phase II. Operation  
Report., internal report in German (unpublished), 1995g.
- MeSy: CBM - Project Sigillaria License Area. Cased-Hole Permeability And Stress Measurements in Borehole Rieth-1. Operation Report.,  
internal report in German (unpublished), 1995h.
- 495 MeSy: Hydrofrac Spannungsmessungen in Einer Vertikal- und Einer Horizontalbohrung im Bergwerk Niederberg Neukirchen-Vluyn. 3.  
Sohle, ca. - 630 m. Endbericht. Bericht Nr. 19.95., internal report in German (unpublished), 1995i.
- MeSy: Hydrofrac Spannungsmessungen in Einer Vertikal- und Einer Horizontalbohrung auf der 3. Sohle, ca. 630 m Bergwerk Niederberg,  
Neukirchen-Vluyn., internal report in German (unpublished), 1995j.
- MeSy: CBM - Project Sigillaria License Area. Cased-Hole Permeability And Hydrofrac Stress Measurements in Borehole Natrap-1. Final  
500 Report. Report No. 39.95, internal report in German (unpublished), 1995k.
- MeSy: CBM - Project Sigillaria License Area. Open-Hole Permeability And Hydrofrac Stress Measurements in Borehole Natrap-1. Operation  
Report., internal report in German (unpublished), 1995l.
- MeSy: CBM - Project Sigillaria License Area. Cased-Hole Permeability Measurements in Borehole Natrap-1. Final Report. Report No.  
23.96, internal report in German (unpublished), 1996a.
- 505 MeSy: CBM - Project Sigillaria License Area. Cased-Hole Permeability Measurements in Borehole Natrap-1. Final Report. Report No.  
23.96, internal report in German (unpublished), 1996b.
- MeSy: Hydrofrac Spannungsmessungen in Einer Vertikal- und Einer Horizontalbohrung im Bergwerk Niederberg Neukirchen-Vluyn. 3.  
Sohle, ca. - 630 m. Endbericht. Bericht Nr. 02.96., internal report in German (unpublished), 1996c.
- Morawietz, S., Heidbach, O., Reiter, K., Ziegler, M., Rajabi, M., Zimmermann, G., Müller, B., and Tingay, M.: An open-access stress  
510 magnitude database for Germany and adjacent regions, *Geothermal Energy*, 8, 25, <https://doi.org/10.1186/s40517-020-00178-5>, 2020.
- Morris, A., Ferrill, D. A., and Henderson, D. B.: Slip-tendency analysis and fault reactivation, *Geology*, 24, 275–278, 1996.  
[https://doi.org/10.1130/0091-7613\(1996\)024<0275:STAAFR>2.3.CO;2](https://doi.org/10.1130/0091-7613(1996)024<0275:STAAFR>2.3.CO;2)
- Müller, W.: Messung der absoluten Gebirgsspannungen im Steinkohlenbergbau, *Glückauf-Forschungshefte*, 50, 105–112, 1989.
- Müller, W.: The stress state in the Ruhr Coalfield, in: *Proc., 7th ISRM Congress, International Society for Rock Mechanics, Aachen Germany,*  
1991.
- 515 Rajabi, M., Tingay, M., and Heidbach, O.: The present-day stress field of New South Wales, Australia, *Australian Journal of Earth Sciences*,  
63, 1–21, 2016. <https://doi.org/10.1080/08120099.2016.1135821>
- Reiter, K. and Heidbach, O.: 3-D geomechanical–numerical model of the contemporary crustal stress state in the Alberta Basin (Canada),  
*Solid Earth*, 5, 1123–1149, 2014. <https://doi.org/10.5194/se-5-1123-2014>
- Reiter, K., Heidbach, O., Reinecker, J., Müller, B., and Röckel, T.: Spannungskarte Deutschland 2015, *Erdöl Erdgas Kohle*, 131, 437–442,  
520 2015. [https://gfzpublic.gfz-potsdam.de/pubman/item/item\\_1361435](https://gfzpublic.gfz-potsdam.de/pubman/item/item_1361435)
- Rummel, F. and Weber, U.: Stress field in the coal mines of the Ruhr coal district, in: *Géotechnique[001E01001], MeSy Geo-Messsysteme*  
GmbH, U.S. symposium on rock mechanics. 34 (0 ; Madison, 1993-06-27), Bochum 4630, Germany, 1993.
- Schmitt, D. R., Currie, C. A., and Zhang, L.: Crustal stress determination from boreholes and rock cores: Fundamental principles, *Tectono-*  
*physics*, 580, 1–26, 2012. <https://doi.org/10.1016/j.tecto.2012.08.029>
- 525 Segall, P. and Fitzgerald, S. D.: A note on induced stress changes in hydrocarbon and geothermal reservoirs, *Tectonophysics*, 289, 117–128,  
1998. [https://doi.org/10.1016/S0040-1951\(97\)00311-9](https://doi.org/10.1016/S0040-1951(97)00311-9)



- Sheorey, P.: A theory for In Situ stresses in isotropic and transverseley isotropic rock, *International Journal of Rock Mechanics and Mining Sciences & Geomechanics Abstracts*, 31, 23–34, [https://doi.org/https://doi.org/10.1016/0148-9062\(94\)92312-4](https://doi.org/https://doi.org/10.1016/0148-9062(94)92312-4), 1994.
- Stelling, W. and Rummel, F.: Messung von Primärspannungen durch Hydraulic Fracturing auf dem Bergwerk Haus Aden, *Mitteilung aus dem Markscheidewesen*, 99, 176–184, 1992.
- 530 Tingay, M., Muller, B., Reinecker, J., and Heidbach, O.: State and origin of the present-day stress field in sedimentary basins: New results from the World Stress Map Project, in: *Golden Rocks 2006, The 41st US Symposium on Rock Mechanics (USRMS)*, OnePetro, 2006.
- Wedewardt, M.: *Hydrochemie und Genese der Tiefenwässer im Ruhrrevier*, DMT-Berichte aus Forschung und Entwicklung 39: 172 S, DMT, Germany, 1995.
- 535 Wu, F. and Zoback, M.: Observations and modelling of co-seismic stress changes in the M7.6 Chi-Chi earthquake, in: *Abstracts of the 3rd World Stress Map conference*, Potsdam, World Stress Map, 2008.
- Ziegler, M. O. and Heidbach, O.: The 3D stress state from geomechanical–numerical modelling and its uncertainties: a case study in the Bavarian Molasse Basin, *Geothermal Energy*, 8, 1–21, 2020. <https://doi.org/10.1186/s40517-020-00162-z>
- Ziegler, P. A.: *Geological atlas of western and central Europe*, Geological Society of London, 1990.
- 540 Zoback, M. D.: *Reservoir Geomechanics*, Cambridge University Press, <https://doi.org/10.1017/CBO9780511586477>, 2007.

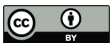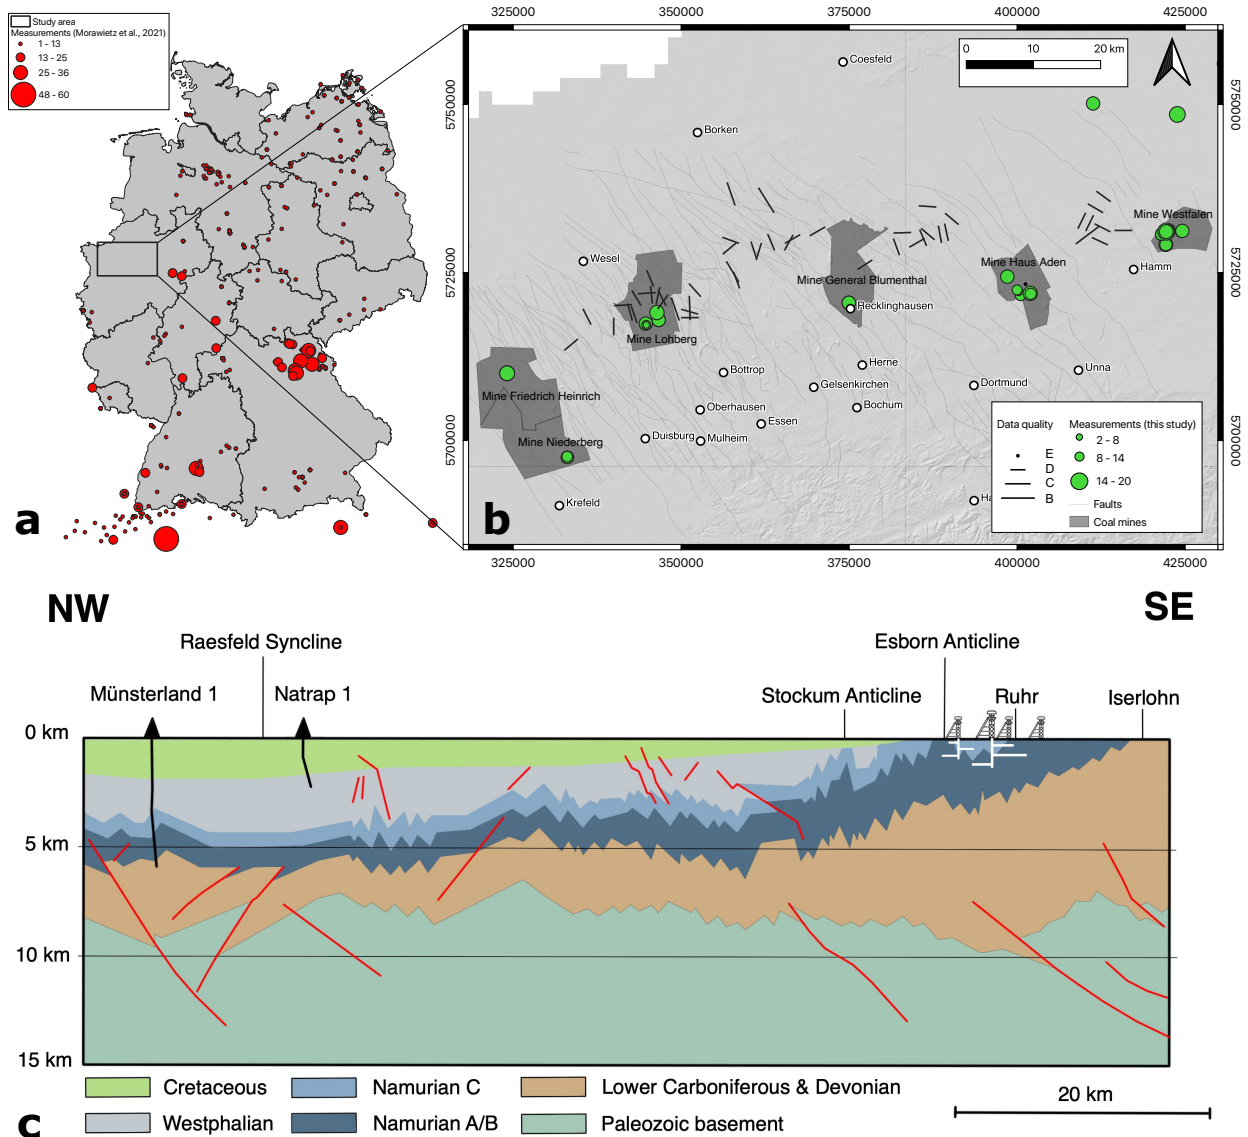

The DEKORP line should be shown in the map

**Figure 1.** a) A map of Germany with administrative regions and available stress magnitudes from Morawietz et al. (2020); b) a map of the greater Ruhr region with major fault zones (modified after GD NRW (2017)) and locations of stress magnitude data records described in this study with black shaded areas representing coal mines active in 1980s (black thick lines show the orientation of the maximum horizontal stress,  $S_{Hmax}$ , available in the World Stress Map database 2016 (Heidbach et al., 2018), where line length is proportional to the data quality); c) a simplified geological cross-section of the northern part of the DEKORP 2-N seismic line (DEKORP, 1990) with fault zones marked in red (modified after Drozdowski (1988)).

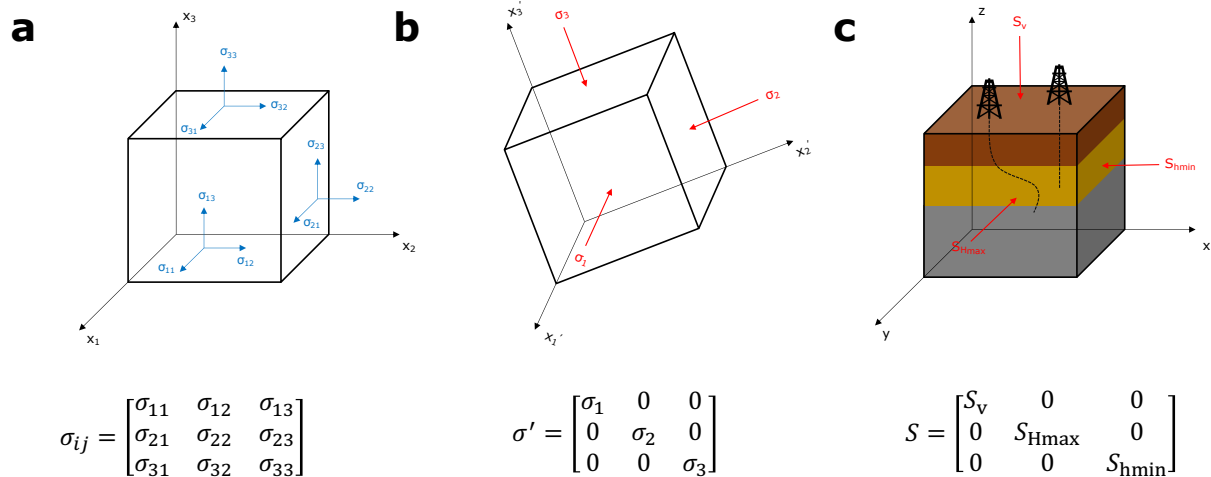

**Figure 2.** The nine stress tensor components define the stress state at any point and enable the determination of a stress vector on any surface within a given body (a). Based on the momentum conservation, a stress tensor has to be symmetric, which means that a coordinate system exists where shear stresses are negligible along the cube faces (b). In this, so-called, principal axis system remaining stresses are called principal stresses. With an assumption that vertical stress,  $S_V$ , is a principal stress, which is a common assumption within the Earth crust, minimum,  $S_{hmin}$ , and maximum,  $S_{Hmax}$ , horizontal stresses are also considered to be principal stresses (c). As a result, the so-called, reduced stress tensor can be fully determined with only four components including  $S_{Hmax}$  orientation and magnitudes of  $S_{hmin}$ ,  $S_{Hmax}$ , and  $S_V$ .

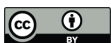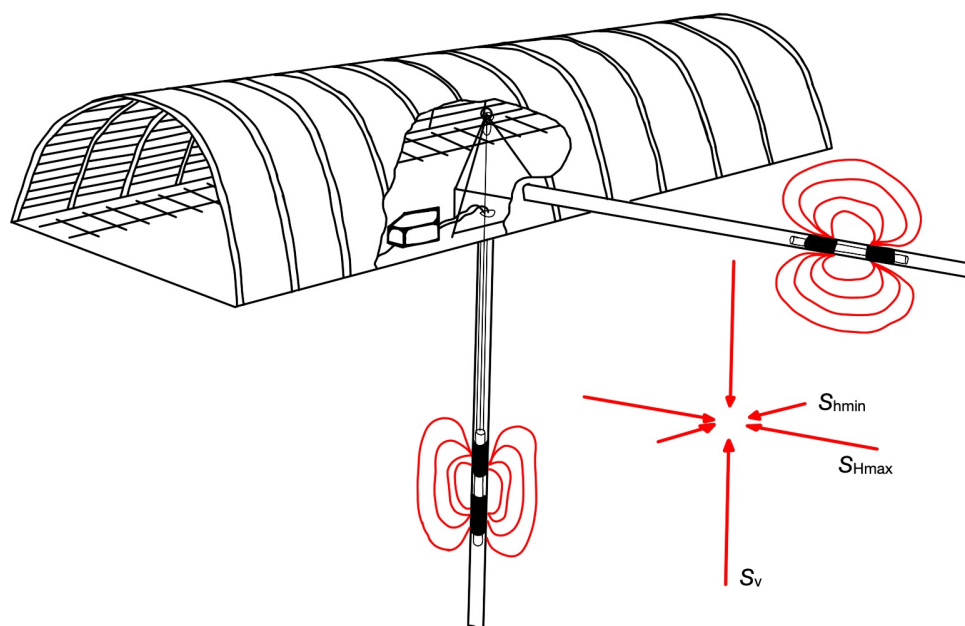

**Figure 3.** A schematic set-up for a hydrofracturing test in a coal mine with both vertical and horizontal boreholes and induced fractures presented in red (modified after MeSy (1994)).

Really not an important issue but actually this sketch originally is from the Diplomarbeit of Kück (1988) - handdrawn - only the frac propagation and the arrows were changed to red color.

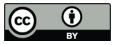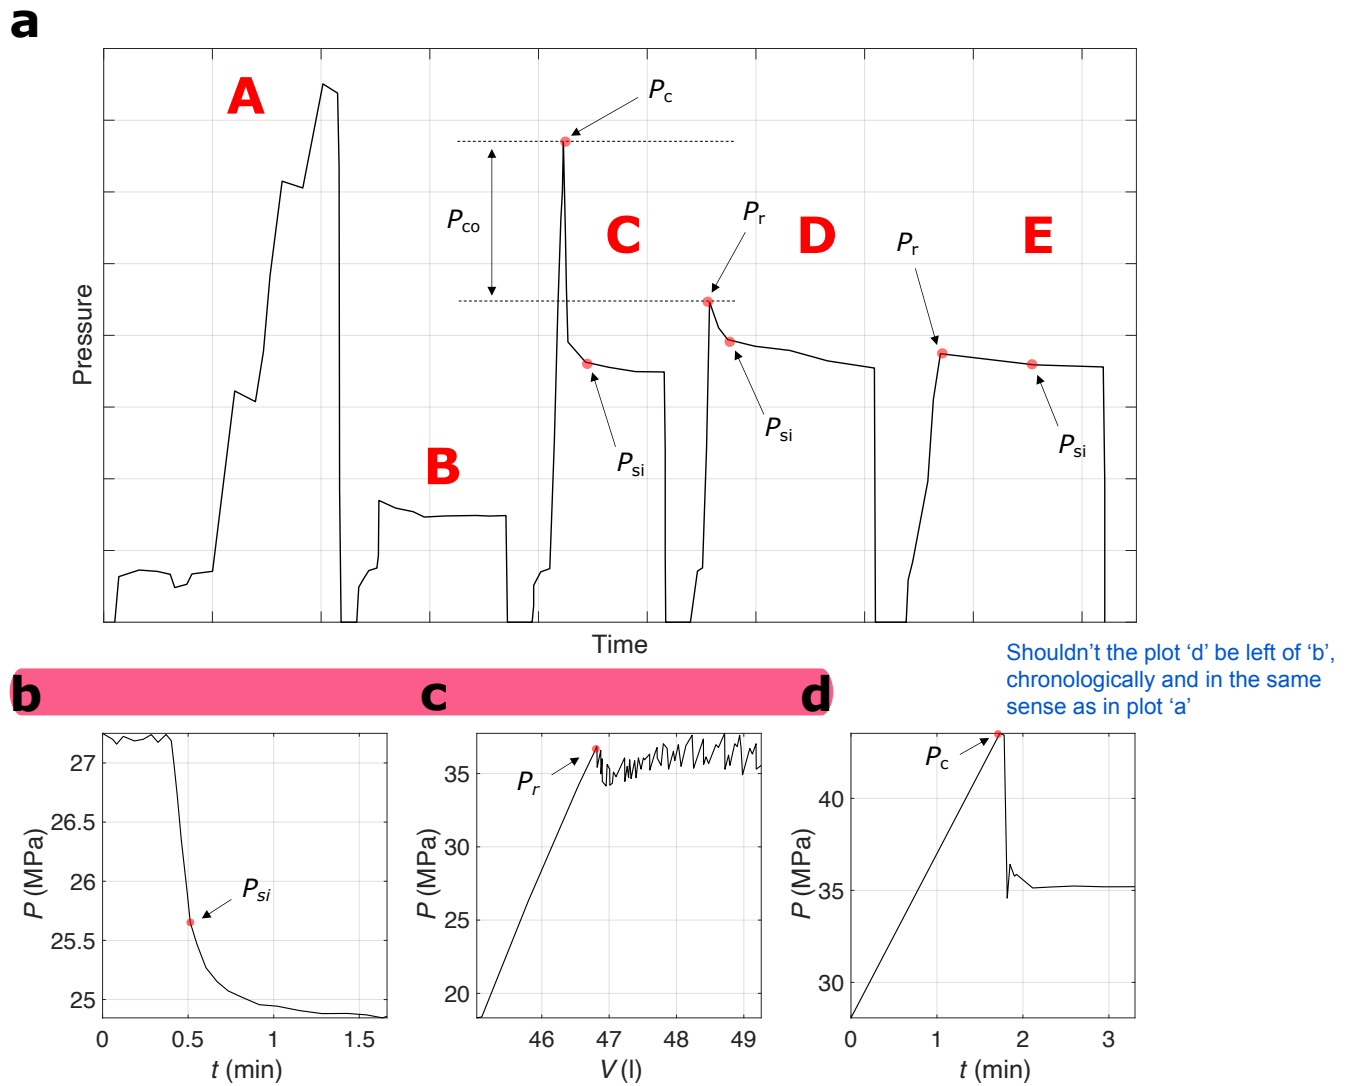

**Figure 4.** a) A schematic example of a hydrofracturing test carried out in a coal mine within the Ruhr region (A - packer inflation, B - pressure pulse test, C - fracture initiation test, D - first refracturing test, and E - second refracturing test,  $P_c$  - breakdown pressure at fracture initiation,  $P_r$  - fracture reopening pressure,  $P_{si}$  - shut-in pressure during fracture closure,  $P_{co}$  - rock mass (hydrofracturing) tensile strength); An example of a typical hydrofracturing test carried out in an open hole section of the Natrap-1 well at true vertical depth of 1584 m (MeSy, 1995d) with methodology for estimation of b)  $P_{si}$ , c)  $P_r$ , and d)  $P_c$ .

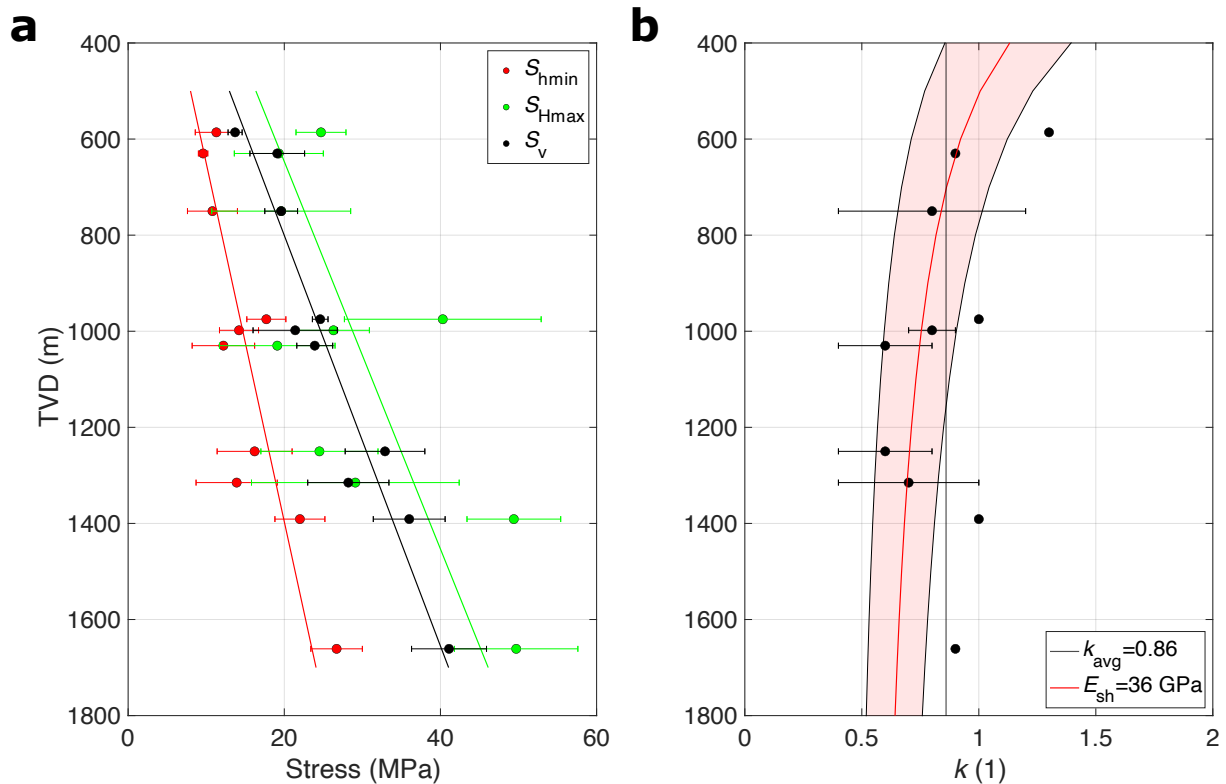

**Figure 5.** a) In situ stress test recorded across the greater Ruhr region based on averaged values from each test location (differentiation was made for values from different depth levels in the same coal mine) with trend lines computed based on Equation 7, 8, and 9 (see Table 3 for the actual values; TVD - true vertical depth); b) mean stress ratio,  $k$ , (i.e., ratio of average horizontal stress and the vertical stress) based on the averaged stress tests recorded across the greater Ruhr region (see Table 3 for actual values). The average  $k$  of 0.86 based on hydrofracturing test results acquired from this study, is marked with a solid black line; for comparison  $k$  computed based on the approach by Sheorey (1994) for Young's modulus,  $E_{sh}$ , of  $36 \pm 11$  GPa based on laboratory measurements on core samples from the Westfalen coal mine (MeSy, 1994) is presented with solid red line and area shaded in red represent standard deviation.



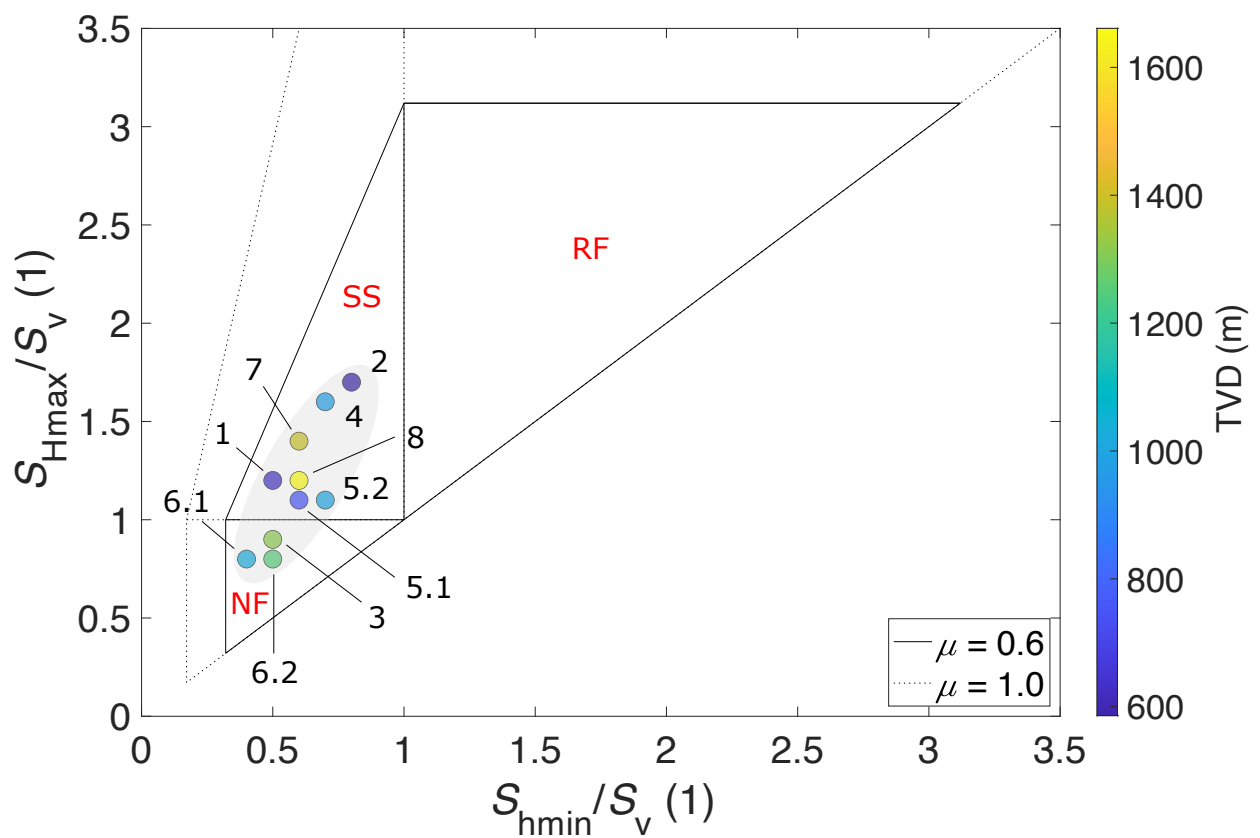

**Figure 6.** Normalized stress polygon for two different coefficients of friction,  $\mu$ , of 0.6 and 1.0 with averaged values recorded across the greater Ruhr region (see Table 3 for the actual values) for each test location and depth level (NF - normal faulting, SS - strike-slip faulting, RF - reverse/thrust faulting, TVD - true vertical depth). Numbers correlate to references from Table 3. The stress regime of the study area, based on the collected data within this study, is shaded in light grey.

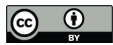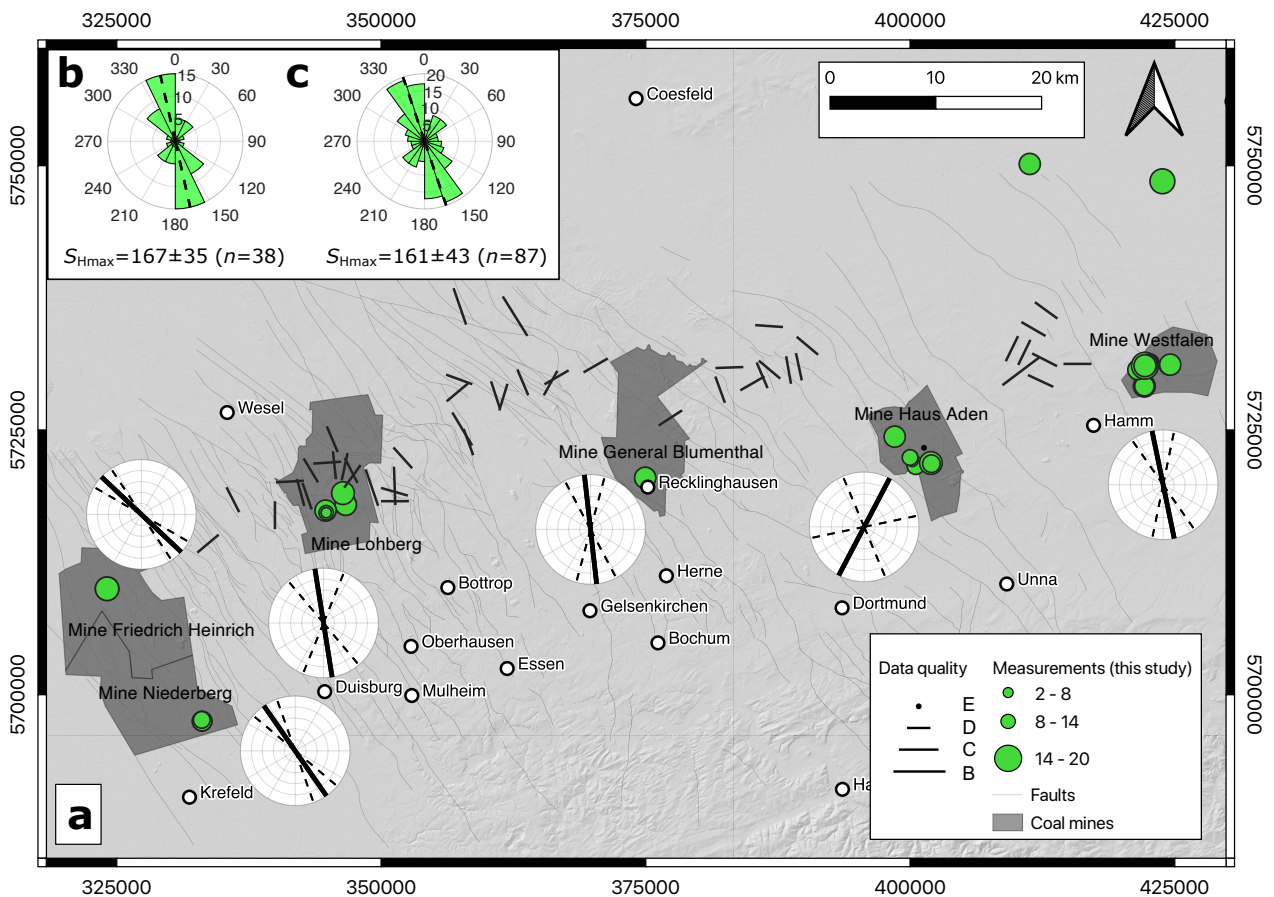

**Figure 7.** a) A map of the greater Ruhr region with major geological discontinuities (modified after GD NRW (2017)) and locations of stress magnitude data records described in this study; black shaded areas represent coal mining areas active in 1980s; polar plots represent average  $S_{Hmax}$  orientations (solid line) and its standard deviation (dashed line) registered in each coal mine (black thick lines show the orientation of the maximum horizontal stress,  $S_{Hmax}$ , available in the World Stress Map database 2016 (Heidbach et al., 2018), where line length is proportional to data quality); b) rose plot of  $S_{Hmax}$  orientations based on hydrofracturing tests collected in this study ( $n = 38$ ) with D- and E-qualities where average  $S_{Hmax}$  orientation (dashed line) amounted to  $167 \pm 35^\circ$ ; c) rose plot of  $S_{Hmax}$  orientation data records based on this study and data points from the greater Ruhr region available in the World Stress Map database release from 2016 (Heidbach et al., 2018), with B- to E-qualities, with an average  $S_{Hmax}$  orientation (dashed line) of  $161 \pm 43^\circ$  ( $n = 87$ ).

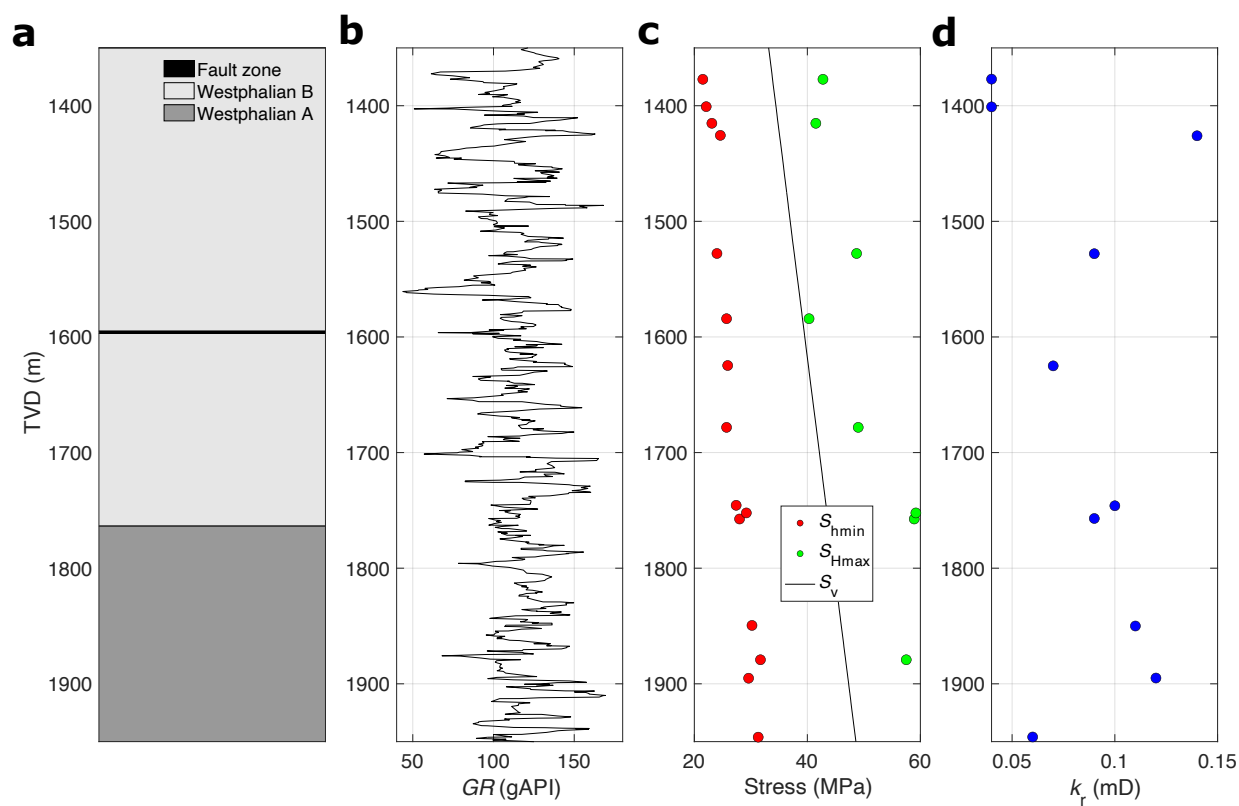

**Figure 8.** Results of the deeper sections of the Natrap-1 well (TVD - true vertical depth) with a) lithostratigraphic column, b) gamma-ray,  $GR$ , log (due to high sampling frequency of the gamma-ray log, data presented here was smoothed out), c) magnitudes of a minimum horizontal stress,  $S_{hmin}$ , maximum horizontal stress,  $S_{Hmax}$ , and vertical stress,  $S_v$ , measured in the Natrap-1 borehole ( $S_v$  was computed based on a bulk density log available between depth of 1300 and 1970 m, with an assumption of bulk density of rock mass of  $2500 \text{ kg m}^{-3}$  between surface and depth of 1300 m), and d) measured rock mass permeability,  $k_r$ .

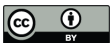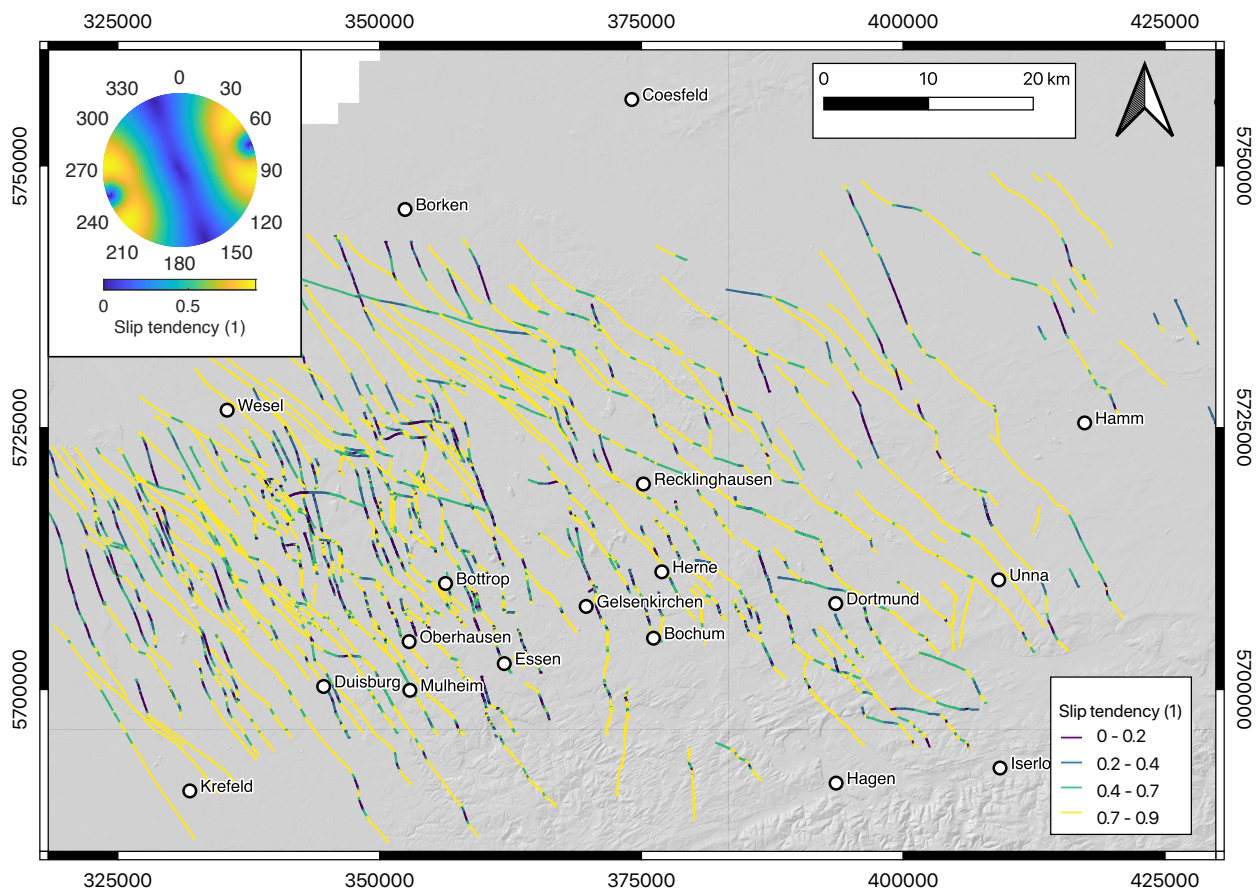

**Figure 9.** Slip tendency of geological discontinuities within the Ruhr region (GD NRW, 2017) at depth of 1200 m computed based on the stress tensor constrained from this study with  $P_p$  of 13.2 MPa,  $S_{Hmin}$  of 17.4 MPa,  $S_{Hmax}$  of 33.7 MPa,  $S_v$  of 29.3 MPa, and average  $S_{Hmax}$  orientation of  $161^\circ$ . **Stereographic projection of slip tendency** based on the constructed stress tensor is presented in top left corner.

Some discontinuities appear in black but in the caption the darkest color seems to be violett, maybe choose another color like red.

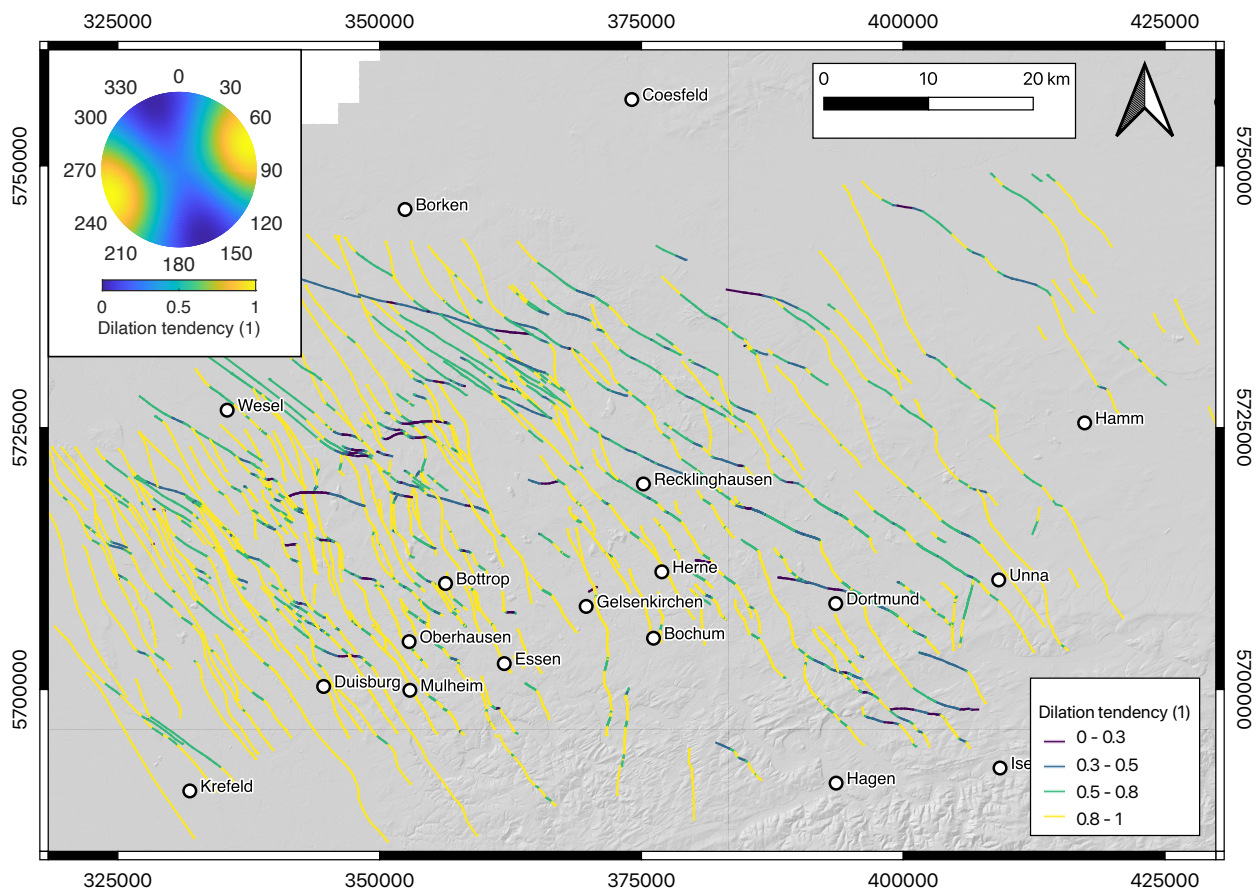

**Figure 10.** Dilation tendency of geological discontinuities within the Ruhr region (GD NRW, 2017) at depth of 1200 m computed based on the stress tensor constrained from this study with  $P_p$  of 13.2 MPa,  $S_{Hmin}$  of 17.4 MPa,  $S_{Hmax}$  of 33.7 MPa,  $S_v$  of 29.3 MPa, and average  $S_{Hmax}$  orientation of  $161^\circ$ ; Stereographic projection of dilation tendency based on the constructed stress tensor is presented in top left corner.

Like above, some discontinuities appear in black but in the caption the darkest color seems to be violett, maybe choose another color like red.



**Table 1.** Results of hydrofracturing tests performed across the greater Ruhr region averaged across a single borehole (TVD - true vertical depth,  $L_i$  - length of a test interval,  $N_m$  - number of stress magnitude tests,  $P_{si}$  - shut-in pressure during fracture closure,  $P_r$  - fracture reopening pressure,  $P_c$  - breakdown pressure at fracture initiation,  $P_{co}$  - rock mass (hydrofracturing) tensile strength). Easting and northing were presented according to the EPSG:31466 geographical projection; \*horizontal borehole.

|     | City             | Easting | Northing | Borehole     | TVD (m)   | $L_i$ (m) | $N_m$ (1) | $P_{si}$ (MPa) | $P_r$ (MPa) | $P_c$ (MPa) | $P_{co}$ (MPa) |
|-----|------------------|---------|----------|--------------|-----------|-----------|-----------|----------------|-------------|-------------|----------------|
| 1   | Neukirchen-Vluyn | 2541789 | 5696767  | 0992/479V    | 630       | 31.2      | 10        | 9.9±2.2        | 10.5±1.9    | 13.7±0.4    | 3.5±1.1        |
| 2*  | Neukirchen-Vluyn | 2541784 | 5696783  | 0992/481H    | 630       | 38.4      | 10        | 10.1±3.2       | 10.9±3.3    | 15.8±4.8    | 5.6±2.8        |
| 3*  | Neukirchen-Vluyn | 2541750 | 5696893  | 0992/335H    | 630       | 19.5      | 7         | 8.9±3.9        | 12.6±3.6    | 16.1±3.0    | 3.5±1.7        |
| 4   | Kamp-Lintfort    | 2532300 | 5708910  | 0420/617-T/V | 586       | 28.0      | 15        | 13.2±1.4       | 14.9±1.9    | 20.0±2.9    | 5.1±2.7        |
| 5*  | Kamp-Lintfort    | 2532300 | 5708910  | 0420/617-T/H | 586       | 28.0      | 15        | 9.4±2.8        | 15.2±3.9    | 19.3±3.5    | 4.2±2.6        |
| 6   | Dinslaken        | 2554521 | 5717775  | B1V          | 1315      | 21.8      | 7         | 15.8±5.3       | 17.7±4.6    | 23.3±2.0    | 3.3±1.6        |
| 7*  | Dinslaken        | 2554521 | 5717775  | B1H90        | 1315      | 33.0      | 12        | 15.8±1.4       | 19.9±3.1    | 28.4±3.7    | 8.3±3.9        |
| 8*  | Dinslaken        | 2554521 | 5717775  | B1H45        | 1315      | 33.0      | 12        | 15.1±2.6       | 20.7±2.9    | 25.2±5.5    | 5.0±2.8        |
| 9   | Dinslaken        | 2554211 | 5718859  | B2V          | 1315      | 15.9      | 8         | 20.5±10.7      | 19.3±12.6   | 34.8±6.7    | 7.7±5.9        |
| 10* | Dinslaken        | 2554211 | 5718859  | B2H90        | 1315      | 21.0      | 8         | 15.3±2.8       | 19.6±2.8    | 31.4±2.8    | 11.8±1.2       |
| 11* | Dinslaken        | 2554211 | 5718859  | B2H45        | 1315      | 39.0      | 14        | 15.1±5.7       | 20.5±5.7    | 23.4±5.4    | 2.9±1.9        |
| 12  | Dinslaken        | 2552633 | 5717141  | B3V          | 1315      | 9.0       | 4         | 8.1±5.7        | 15.9±5.3    | 19.6±2.9    | 3.7±2.9        |
| 13* | Dinslaken        | 2552633 | 5717141  | B3H90        | 1315      | 33.0      | 12        | 11.7±1.5       | 15.6±2.7    | 32.4±7.0    | 15.6±6.6       |
| 14  | Dinslaken        | 2552704 | 5716944  | B4V          | 1315      | 12.0      | 5         | 11.8±3.0       | 14.3±3.5    | 16.3±4.5    | 2.0±2.4        |
| 15* | Dinslaken        | 2552704 | 5716944  | B4H80        | 1315      | 3.0       | 2         | 5.8±1.1        | 12.5±2.1    | 18.5±9.9    | 6.0±7.8        |
| 16  | Recklinghausen   | 2582700 | 5721480  | B7V          | 975       | 30.0      | 11        | 15.9±9.3       | 16.2±8.7    | 24.8±11.1   | 8.7±3.6        |
| 17* | Recklinghausen   | 2582700 | 5721480  | B5H          | 975       | 28.5      | 11        | 19.5±8.0       | 21.0±6.5    | 27.2±7.3    | 6.0±2.1        |
| 18* | Recklinghausen   | 2582700 | 5721480  | B6H          | 975       | 20.6      | 12        | 25.3±2.8       | 26.6±1.8    | 31.3±3.1    | 4.7±3.1        |
| 19  | Bergkamen        | 2606159 | 5726277  | B1165V       | 750       | 12.0      | 6         | 14.5±2.9       | 17.5±3.8    | 22.7±4.8    | 5.2±2.2        |
| 20* | Bergkamen        | 2606112 | 5726340  | B1166H       | 750       | 33.2      | 8         | 12.3±1.9       | 15.1±1.2    | 23.4±3.6    | 8.3±4.0        |
| 21  | Bergkamen        | 2606166 | 5726265  | B1229V       | 750       | 11.5      | 5         | 7.8±1.8        | 10.0±2.6    | 15.3±1.2    | 4.3±2.9        |
| 22* | Bergkamen        | 2606114 | 5726337  | B1231H       | 750       | 33.0      | 12        | 8.4±3.2        | 11.6±4.0    | 14.4±4.2    | 3.0±0.8        |
| 23  | Bergkamen        | 2608208 | 5723695  | B1060V       | 998       | 19.7      | 6         | 14.2±3.4       | 17.1±4.9    | 20.5±6.6    | 4.4±1.5        |
| 24* | Bergkamen        | 2608215 | 5723684  | B1059H       | 998       | 22.6      | 8         | 15.7±2.1       | 18.6±2.3    | 23.3±3.7    | 4.8±2.9        |
| 25  | Bergkamen        | 2607863 | 5724143  | B1078V       | 998       | 20.1      | 3         | 11.2±1.5       | 12.3±3.4    | 16.2±8.5    | 4.6±4.3        |
| 26* | Bergkamen        | 2607647 | 5724428  | B1061H       | 998       | 18.7      | 6         | 11.3±3.3       | 13.6±5.2    | 16.0±5.5    | 3.2±0.9        |
| 27  | Bergkamen        | 2609634 | 5723984  | B1172V       | 998       | 40.0      | 14        | 17.6±4.3       | 20.6±4.0    | 27.5±9.2    | 6.5±7.3        |
| 28  | Bergkamen        | 2609688 | 5723924  | B1173V       | 998       | 20.9      | 8         | 15.0±2.0       | 19.1±3.0    | 28.6±8.7    | 9.5±6.0        |
| 29  | Hamm (Westph.)   | 2628956 | 5733649  | B3V          | 1030      | 28.6      | 11        | 12.6±1.7       | 13.6±3.4    | 20.8±2.7    | 7.1±2.4        |
| 30* | Hamm (Westph.)   | 2628931 | 5733606  | B4H          | 1030      | 26.3      | 12        | 9.2±1.1        | 11.4±1.7    | 17.8±1.6    | 6.4±1.7        |
| 31  | Hamm (Westph.)   | 2631717 | 5734126  | B10V         | 1030      | 22.0      | 9         | 9.1±2.2        | 13.4±2.2    | 21.2±4.7    | 7.8±2.9        |
| 32* | Hamm (Westph.)   | 2631866 | 5734210  | B9H          | 1030      | 32.0      | 12        | 17.7±3.5       | 21.8±6.0    | 29.5±6.3    | 6.1±2.0        |
| 33  | Hamm (Westph.)   | 2629500 | 5732082  | B1V          | 1250      | 35.0      | 13        | 16.7±8.0       | 18.0±8.4    | 26.6±11.8   | 9.5±6.3        |
| 34* | Hamm (Westph.)   | 2629518 | 5732078  | B2H          | 1250      | 27.0      | 10        | 19.0±2.5       | 20.5±2.2    | 25.5±3.6    | 5.1±1.6        |
| 35  | Hamm (Westph.)   | 2629483 | 5734011  | B5V          | 1250      | 33.0      | 12        | 16.6±2.4       | 18.3±2.6    | 27.2±3.8    | 8.9±2.7        |
| 36  | Hamm (Westph.)   | 2628802 | 5733590  | B6V          | 1250      | 27.0      | 10        | 13.8±4.9       | 16.9±5.3    | 25.0±3.7    | 8.1±3.5        |
| 37  | Hamm (Westph.)   | 2629939 | 5734272  | B7V          | 1250      | 28.0      | 9         | 10.8±2.8       | 13.2±4.6    | 17.8±2.9    | 4.6±3.1        |
| 38* | Hamm (Westph.)   | 2629483 | 5734011  | B8H          | 1250      | 30.0      | 20        | 24.2±2.9       | 27.5±2.5    | 36.7±3.3    | 9.2±2.8        |
| 39  | Hamm (Westph.)   | 2629671 | 5734117  | B11V         | 1250      | 16.0      | 7         | 8.0±2.3        | 8.9±2.4     | 19.1±5.5    | 9.4±4.4        |
| 40* | Hamm (Westph.)   | 2629671 | 5734117  | B12H         | 1250      | 33.0      | 11        | 17.9±3.6       | 23.1±7.3    | 33.9±3.8    | 8.7±2.4        |
| 41* | Hamm (Westph.)   | 2629483 | 5734011  | B13H         | 1250      | 36.0      | 13        | 18.4±0.7       | 20.9±1.4    | 33.6±3.4    | 12.7±3.7       |
| 42  | Drensteinfurt    | 2617815 | 5738769  | Rieth-1      | 1081-1702 | 621.3     | 12        | 22.0±3.2       | 22.4±3.0    | -           | -              |
| 43  | Münster          | 2630415 | 5752626  | Natrap-1     | 1377-1946 | 569.0     | 17        | 26.7±3.3       | 28.7±6.1    | 42.4±3.8    | 8.8±4.8        |



**Table 2.** Results of hydrofracturing tests performed across the greater Ruhr region averaged across a single borehole (TVD - true vertical depth,  $L_i$  - length of a test interval,  $N_m$  - number of stress magnitude tests,  $S_{Hmin}$  - magnitude of the minimum horizontal stress,  $S_{Hmax}$  - magnitude (and orientation) of the maximum horizontal stress,  $S_v$  - magnitude of the vertical horizontal stress,  $Q_a$  - quality of the  $S_{Hmax}$  orientation data record). Easting and northing were presented according to the EPSG:31466 geographical projection; \*horizontal borehole, \*\*computed based on bulk density of the rock mass of  $2500 \text{ kg m}^{-3}$ .

|     | City             | Easting | Northing | Borehole     | TVD (m)   | $L_i$ (m) | $N_m$ (1) | $S_{Hmin}$ (MPa) | $S_{Hmax}$ (MPa) | $S_v$ (MPa) | $N_a$ (1) | $S_{Hmax}$ (°) | $Q_a$ |
|-----|------------------|---------|----------|--------------|-----------|-----------|-----------|------------------|------------------|-------------|-----------|----------------|-------|
| 1   | Neukirchen-Vluyn | 2541789 | 5696767  | 0992/479V    | 630       | 31.2      | 10        | 9.9±2.2          | 19.3±5.7         | 15.5**      | 6         | 131±22         | D     |
| 2*  | Neukirchen-Vluyn | 2541784 | 5696783  | 0992/481H    | 630       | 28.4      | 10        | 10.1±3.2         | -                | 19.3±7.0    | 8         | 140±21         | D     |
| 3*  | Neukirchen-Vluyn | 2541750 | 5696893  | 0992/335H    | 630       | 19.5      | 7         | 8.9±3.9          | -                | 22.5        | 7         | 166±35         | D     |
| 4   | Kamp-Lintfort    | 2532300 | 5708910  | 0420/617-T/V | 586       | 28.0      | 15        | 13.2±1.4         | 24.7±3.2         | 14.4**      | 13        | 120±22         | D     |
| 5*  | Kamp-Lintfort    | 2532300 | 5708910  | 0420/617-T/H | 586       | 28.0      | 15        | 9.4±2.8          | -                | 13.1±5.8    | 14        | 146±23         | D     |
| 6   | Dinslaken        | 2554521 | 5717775  | B1V          | 1315      | 21.8      | 7         | 15.8±5.3         | 29.6±11.3        | 32.3**      | 5         | 158±11         | D     |
| 7*  | Dinslaken        | 2554521 | 5717775  | B1H90        | 1315      | 33.0      | 12        | 15.8±1.4         | -                | 27.5±4.9    | 11        | 162±9          | D     |
| 8*  | Dinslaken        | 2554521 | 5717775  | B1H45        | 1315      | 33.0      | 12        | 15.1±2.6         | -                | -           | 2         | 16±56          | E     |
| 9   | Dinslaken        | 2554211 | 5718859  | B2V          | 1315      | 15.9      | 8         | 25.0±4.4         | 47.7±9.8         | 32.3**      | 4         | 150±9          | D     |
| 10* | Dinslaken        | 2554211 | 5718859  | B2H90        | 1315      | 21.0      | 8         | 15.3±2.8         | -                | 26.3±6.1    | -         | -              | -     |
| 11* | Dinslaken        | 2554211 | 5718859  | B2H45        | 1315      | 39.0      | 14        | 15.1±5.7         | -                | 24.9±11.6   | 9         | 31±28          | D     |
| 12  | Dinslaken        | 2552633 | 5717141  | B3V          | 1315      | 9.0       | 4         | 8.1±5.7          | 18.0±12.7        | 32.3**      | 3         | 88±42          | E     |
| 13* | Dinslaken        | 2552633 | 5717141  | B3H90        | 1315      | 33.0      | 12        | 11.7±1.5         | -                | 17.7±6.9    | 10        | 171±6          | D     |
| 14  | Dinslaken        | 2552704 | 5716944  | B4V          | 1315      | 12.0      | 5         | 11.8±3.0         | 21.2±5.9         | 32.3**      | 5         | 169±41         | E     |
| 15* | Dinslaken        | 2552704 | 5716944  | B4H80        | 1315      | 3.0       | 2         | 5.8±1.1          | -                | -           | -         | -              | -     |
| 16  | Recklinghausen   | 2582700 | 5721480  | B7V          | 975       | 30.0      | 11        | 15.9±9.3         | 31.4±19.5        | 23.9**      | 11        | 163±38         | D     |
| 17* | Recklinghausen   | 2582700 | 5721480  | B5H          | 975       | 28.5      | 11        | 19.5±8.0         | -                | -           | 9         | 158±41         | E     |
| 18* | Recklinghausen   | 2582700 | 5721480  | B6H          | 975       | 20.6      | 12        | -                | 49.2±7.7         | 25.3±2.8    | 12        | 24±40          | E     |
| 19  | Bergkamen        | 2606159 | 5726277  | B1165V       | 750       | 12.0      | 6         | 14.5±2.9         | 25.9±5.2         | 18.4**      | 3         | 104±17         | D     |
| 20* | Bergkamen        | 2606112 | 5726340  | B1166H       | 750       | 33.2      | 8         | 12.3±1.9         | -                | 22.0±5.2    | 3         | 52±20          | D     |
| 21  | Bergkamen        | 2606166 | 5726265  | B1229V       | 750       | 11.5      | 5         | 7.8±1.8          | 13.3±2.4         | 18.4**      | 3         | 129±15         | D     |
| 22* | Bergkamen        | 2606114 | 5726337  | B1231H       | 750       | 33.0      | 12        | 8.4±3.2          | -                | -           | 11        | 131±27         | D     |
| 23  | Bergkamen        | 2608208 | 5723695  | B1060V (B2V) | 998       | 19.7      | 6         | 14.2±3.4         | 25.4±6.0         | 24.5**      | 4         | 40±12          | D     |
| 24* | Bergkamen        | 2608215 | 5723684  | B1059H (B1H) | 998       | 22.6      | 8         | 15.7±2.1         | -                | 19.3±5.8    | 4         | 41±6           | D     |
| 25  | Bergkamen        | 2607863 | 5724143  | B1078V (B4V) | 998       | 20.1      | 3         | 11.2±1.5         | 21.3±1.3         | 24.5**      | 2         | 26±24          | D     |
| 26* | Bergkamen        | 2607647 | 5724428  | B1061H (B2H) | 998       | 18.7      | 6         | 11.3±3.3         | -                | 11.2±6.5    | 4         | 53±4           | D     |
| 27  | Bergkamen        | 2609634 | 5723984  | B1172V       | 998       | 40.0      | 14        | 17.6±4.3         | 32.4±9.5         | 24.5**      | 12        | 170±39         | D     |
| 28  | Bergkamen        | 2609688 | 5723924  | B1173V       | 998       | 20.9      | 8         | 15.0±2.0         | 25.9±3.0         | 24.5**      | 8         | 175±18         | D     |
| 29  | Hamm (Westph.)   | 2628956 | 5733649  | B3V          | 1030      | 28.6      | 11        | 12.6±1.7         | 24.3±3.0         | 25.3**      | 5         | 1±17           | D     |
| 30* | Hamm (Westph.)   | 2628931 | 5733606  | B4H          | 1030      | 26.3      | 12        | 9.2±1.1          | -                | 21.2±6.0    | 3         | 176±17         | D     |
| 31  | Hamm (Westph.)   | 2631717 | 5734126  | B10V         | 1030      | 22.0      | 9         | 9.1±2.2          | 13.9±4.9         | 25.3**      | 5         | 134±21         | D     |
| 32* | Hamm (Westph.)   | 2631866 | 5734210  | B9H          | 1030      | 32.0      | 12        | 17.7±3.5         | -                | -           | 5         | 3±19           | D     |
| 33  | Hamm (Westph.)   | 2629500 | 5732082  | B1V          | 1250      | 35.0      | 13        | 16.7±8.0         | 32.0±15.8        | 30.7**      | 5         | 20±36          | D     |
| 34* | Hamm (Westph.)   | 2629518 | 5732078  | B2H          | 1250      | 27.0      | 10        | 19.0±2.5         | -                | -           | 8         | 33±5           | D     |
| 35  | Hamm (Westph.)   | 2629483 | 5734011  | B5V          | 1250      | 33.0      | 12        | 16.6±2.4         | 31.6±4.8         | 30.7**      | 7         | 132±47         | E     |
| 36  | Hamm (Westph.)   | 2628802 | 5733590  | B6V          | 1250      | 27.0      | 10        | 13.8±4.9         | 24.5±9.4         | 30.7**      | 5         | 164±23         | D     |
| 37  | Hamm (Westph.)   | 2629939 | 5734272  | B7V          | 1250      | 28.0      | 9         | 10.8±2.8         | 19.1±3.9         | 30.7**      | -         | -              | -     |
| 38* | Hamm (Westph.)   | 2629483 | 5734011  | B8H          | 1250      | 30.0      | 20        | 24.2±2.9         | -                | 45.2±6.5    | 8         | 156±15         | D     |
| 39  | Hamm (Westph.)   | 2629671 | 5734117  | B11V         | 1250      | 16.0      | 7         | 8.0±2.3          | 15.1±4.4         | 30.7**      | 3         | 163±5          | D     |
| 40* | Hamm (Westph.)   | 2629671 | 5734117  | B12H         | 1250      | 33.0      | 11        | 17.9±3.6         | -                | 30.6±4.1    | 4         | 171±19         | D     |
| 41* | Hamm (Westph.)   | 2629483 | 5734011  | B13H         | 1250      | 36.0      | 13        | 18.4±0.7         | -                | 34.3        | 13        | 155±17         | D     |
| 42  | Drensteinfurt    | 2617815 | 5738769  | Rieth-1      | 1081-1702 | 621.3     | 12        | 22.0±3.2         | 49.4±6.0         | 36.0±4.6    | -         | -              | -     |
| 43  | Hoetmar          | 2630415 | 5752626  | Natrap-1     | 1377-1946 | 569.0     | 17        | 26.7±3.3         | 49.7±7.9         | 41.1±4.8    | -         | -              | -     |



**Table 3.** Average values for each test location obtained from the results of the hydrofracturing testing campaign performed across the greater Ruhr region; values were averaged for the same depth level (TVD - true vertical depth,  $N_b$  - number of boreholes,  $N_m$  - number of stress magnitude tests,  $N_a$  - number of the stress orientation measurements,  $S_{Hmin}$  - magnitude of the minimum horizontal stress,  $S_{Hmax}$  - magnitude of the maximum horizontal stress,  $S_v$  - magnitude of the vertical stress,  $k$  - mean stress ratio. Easting and northing were presented according to the EPSG:31466 geographical projection.

| No. | City             | Easting | Northing | Year      | TVD (m) | $N_b$ (1) | $N_m$ (1) | $N_a$ (1) | $S_{Hmin}$ (MPa) | $S_{Hmax}$ (MPa) | $S_v$ (MPa) | $S_{Hmin}/S_v$ (1) | $S_{Hmax}/S_v$ (1) | $k$ (1) | $S_{Hmax}$ (°) |
|-----|------------------|---------|----------|-----------|---------|-----------|-----------|-----------|------------------|------------------|-------------|--------------------|--------------------|---------|----------------|
| 1   | Neukirchen-Vluyn | 2541700 | 5696800  | 1995-1996 | 630     | 3         | 27        | 21        | 9.6±0.6          | 19.3±5.7         | 19.1±3.5    | 0.5±0.1            | 1.2                | 0.9     | 145±15         |
| 2   | Kamp-Lintfort    | 2532800 | 5709300  | 1990      | 586     | 2         | 30        | 27        | 11.3±2.7         | 24.7±3.2         | 13.7±0.9    | 0.8±0.1            | 1.7                | 1.3     | 133±13         |
| 3   | Dinslaken        | 2552900 | 5716800  | 1990-1991 | 1315    | 10        | 84        | 49        | 13.9±5.2         | 29.1±13.3        | 28.2±5.2    | 0.5±0.2            | 0.9±0.4            | 0.7±0.3 | 171±31         |
| 4   | Recklinghausen   | 2583400 | 5719350  | 1992      | 975     | 3         | 34        | 32        | 17.7±2.5         | 40.3±12.6        | 24.6±1.0    | 0.7                | 1.6±0.4            | 1.0     | 173±21         |
| 5.1 | Bergkamen        | 2609600 | 5721750  | 1986-1991 | 750     | 4         | 31        | 54        | 10.8±3.2         | 19.6±8.9         | 19.6±2.1    | 0.6±0.2            | 1.1±0.5            | 0.8±0.4 | 28±51          |
| 5.2 |                  |         |          |           | 998     | 6         | 45        |           | 14.2±2.5         | 26.3±4.6         | 21.4±5.4    | 0.7±0.2            | 1.1±0.2            | 0.8±0.1 |                |
| 6.1 | Hamm (Westph.)   | 2631900 | 5735300  | 1987-1990 | 1030    | 4         | 44        | 71        | 12.2±4.0         | 19.1±7.4         | 23.9±2.3    | 0.4±0.1            | 0.8±0.3            | 0.6±0.2 | 168±23         |
| 6.2 |                  |         |          |           | 1250    | 9         | 105       |           | 16.2±4.8         | 24.5±7.5         | 32.9±5.1    | 0.5±0.1            | 0.8±0.2            | 0.6±0.2 |                |
| 7   | Drensteinfurt    | 2617815 | 5738769  | 1995      | 1391    | 1         | 12        | -         | 22.0±3.2         | 49.4±6.0         | 36.0±4.6    | 0.6                | 1.4                | 1.0     | -              |
| 8   | Hoetmar          | 2630415 | 5752626  | 1995      | 1661    | 1         | 17        | -         | 26.7±3.3         | 49.7±7.9         | 41.1±4.8    | 0.6                | 1.2                | 0.9     | -              |





**Table 4.** Number of data records from the greater Ruhr region, including their quality assignment (based on Morawietz et al. (2020) and Heidbach et al. (2016)), from this and already published studies. As the quality ranking scheme by Morawietz et al. (2020) allows only to determine quality of the  $S_{\text{hmin}}$  magnitude, no quality was assigned to the magnitude estimates of  $S_{\text{Hmax}}$  and  $S_{\text{v}}$ .

| Quality      | $S_{\text{hmin}}$ magnitude |            | $S_{\text{Hmax}}$ magnitude |            | $S_{\text{v}}$ magnitude |            | $S_{\text{Hmax}}$ orientation |            |
|--------------|-----------------------------|------------|-----------------------------|------------|--------------------------|------------|-------------------------------|------------|
|              | Published                   | This study | Published                   | This study | Published                | This study | Published                     | This study |
| A            | 0                           | 367        | 0                           | 0          | 0                        | 0          | 0                             | 0          |
| B            | 0                           | 0          | 0                           | 0          | 0                        | 0          | 2                             | 0          |
| C            | 0                           | 19         | 0                           | 0          | 0                        | 0          | 4                             | 0          |
| D            | 0                           | 0          | 0                           | 0          | 0                        | 0          | 42                            | 32         |
| E            | 0                           | 43         | 0                           | 0          | 0                        | 0          | 1                             | 6          |
| not assigned | 0                           | 0          | 0                           | 188        | 0                        | 341        | 0                             | 0          |
| Total        | 0                           | 429        | 0                           | 188        | 0                        | 341        | 49                            | 38         |
